# Supplementary material
Source: publisher site journal article supplement (https://www.spandidos-publications.com/3122/downloadSupplementary)
Supplement: Supplementary file 1 [file downloadSupplementary]

## Sheet: Table S2
Table SII. Differentially expressed lncRNAs between the CI-AKI group and the control group.
LncRNA_id	Locus	Length	Case1_count	Case2_count	Case3_count	Control1_count	Control2_count	Control3_count	Case1_FPKM	Case2_FPKM	Case3_FPKM	Control1_FPKM	Control2_FPKM	Control3_FPKM	Case	Control	Log2FC	P-value	Q-value	Up/down
MSTRG.22041.2	9:4001077-4002149	959	238	222	426	0	0	0	10.3209	10.9622	20.9439	0	0	0	14.0757	0	1	1.66e-26	3.53e-22	UP
NONRATT023682.2	5:151487571-151488696	1126	472	294	299	8	10	7	17.4326	12.3643	12.5199	0.31359	0.403721	0.286208	14.1056	0.334506	5.39809	7.75e-19	8.23e-15	UP
NONRATT018005.2	3:8827397-8829505	2109	688	595	577	25	49	35	13.5666	13.3599	12.8993	0.523239	1.05617	0.76399	13.2753	0.781133	4.08703	6.43e-14	4.56e-10	UP
NONRATT014889.2	2:11820909-11822791	1883	31	18	34	0	0	0	0.684645	0.452671	0.851324	0	0	0	0.66288	0	1	1.18e-13	6.27e-10	UP
NONRATT010946.2	15:38109632-38137880	1177	1	1	1	122	34	55	0.0353294	0.040231	0.0400402	4.57526	1.31313	2.1512	0.0385335	2.67986	-6.1199	8.21e-13	3.49e-09	DOWN
NONRATT024836.2	6:23456222-23473149	837	25	31	17	0	0	0	1.24216	1.75388	0.957641	0	0	0	1.3179	0	1	2.52e-12	8.91e-09	UP
NONRATT007998.2	12:40225316-40226397	1082	0	0	0	18	22	17	0	0	0	0.734311	0.92428	0.72331	0	0.793967	-1	2.67e-11	8.12e-08	DOWN
NONRATT027338.2	7:142994119-142995026	908	4	19	21	228	224	232	0.183184	0.990895	1.09042	11.0836	11.2143	11.7625	0.754833	11.3535	-3.91083	4.93e-10	1.31e-06	DOWN
NONRATT027428.2	8:12875113-12878749	3637	368	330	235	3510	2778	2761	4.20789	4.29667	3.04643	42.5986	34.7216	34.9479	3.85033	37.4227	-3.28086	1.4e-09	3.3e-06	DOWN
MSTRG.19814.3	7:69398884-69405776	5416	224	294	260	43	20	33	1.72	2.57058	2.2634	0.35045	0.167869	0.280499	2.18466	0.266273	3.03643	4.53e-09	9.63e-06	UP
NONRATT000173.2	1:47130676-47131556	881	9	15	25	130	143	173	0.424841	0.806271	1.33792	6.51326	7.37856	9.04002	0.856344	7.64394	-3.15805	2.49e-08	4.82e-05	DOWN
NONRATT031141.2	X:105351451-105359924	1687	1133	868	0	0	0	0	27.9302	24.365	0	0	0	0	17.4317	0	1	4.51e-08	7.98e-05	UP
MSTRG.11448.4	2:45690973-45709141	8639	378	483	0	0	0	0	1.81965	2.64756	0	0	0	0	1.48907	0	1	8.57e-08	0.00014009	UP
NONRATT026416.2	7:9974310-10195137	2195	29	31	37	5	6	4	0.54944	0.668793	0.794749	0.100552	0.124266	0.083891	0.670994	0.102903	2.70502	1.26e-07	0.000189369	UP
MSTRG.21290.3	8:68671136-68677378	6223	0	0	0	265	603	0	0	0	0	1.87965	4.40482	0	0	2.09482	-1	1.34e-07	0.000189369	DOWN
NONRATT025255.2	6:115320465-115324150	3686	610	524	26	13	15	13	6.88231	6.7319	0.332565	0.155674	0.184987	0.162366	4.64892	0.167676	4.79315	1.48e-07	0.000196877	UP
NONRATT030051.2	9:65406774-65408893	2120	0	0	0	200	0	193	0	0	0	4.16413	0	4.19102	0	2.78505	-1	1.96e-07	0.000245094	DOWN
NONRATT016798.2	2:211762481-211764514	2034	0	0	0	147	0	161	0	0	0	3.19004	0	3.64395	0	2.278	-1	2.48e-07	0.000293041	DOWN
NONRATT024782.2	6:6696340-6709774	766	288	3	268	3	3	2	15.6359	0.185451	16.4957	0.172893	0.178044	0.120196	10.7724	0.157044	6.10002	2.81e-07	0.000314645	UP
MSTRG.628.2	1:73157045-73158747	1673	136	0	65	0	0	0	3.38067	0	1.83183	0	0	0	1.7375	0	1	4.22e-07	0.000447261	UP
NONRATT027876.2	8:81949652-81968999	794	343	286	0	0	0	1	17.9653	17.0572	0	0	0	0.0580082	11.6741	0.0193361	9.23781	4.42e-07	0.000447261	UP
ENSRNOT00000079713	2:51597524-51613880	2788	197	95	3	2	2	1	2.93855	1.61358	0.050728	0.0316627	0.0326171	0.0165203	1.53429	0.0269334	5.83203	4.99e-07	0.000481466	UP
NONRATT026492.2	7:11972668-11982179	590	8	6	10	0	0	0	0.563902	0.481544	0.799091	0	0	0	0.614846	0	1	7.78e-07	0.000718527	UP
MSTRG.22910.1	9:113519970-113523797	3762	0	0	0	49	0	214	0	0	0	0.574924	0	2.61875	0	1.06456	-1	1.02e-06	0.000902707	DOWN
NONRATT020829.2	4:148782480-148784562	1283	365	305	1	3	3	2	11.8311	11.2573	0.0367321	0.103223	0.106299	0.0717618	7.70839	0.0937614	6.36129	1.43e-06	0.00121318	UP
NONRATT025462.2	7:2813613-2814654	1042	3	5	5	28	133	27	0.11972	0.227216	0.22623	1.18609	5.80222	1.19287	0.191056	2.72706	-3.83528	1.71e-06	0.00139987	DOWN
NONRATT016226.2	2:88410569-88413958	425	83	82	66	19	15	15	8.12172	9.13668	7.32185	1.97327	1.60438	1.62483	8.19341	1.73416	2.24023	2.06e-06	0.00162337	UP
NONRATT003860.2	1:266048833-266051081	644	0	0	0	13	4	12	0	0	0	0.891015	0.28234	0.857799	0	0.677051	-1	2.59e-06	0.00196402	DOWN
NONRATT006933.2	11:43987594-43992576	748	21	15	9	0	3	0	1.16754	0.949632	0.567295	0	0.182328	0	0.894822	0.0607762	3.88002	2.98e-06	0.00218369	UP
NONRATT011166.2	15:89261942-89278164	1361	27	151	175	8	11	20	0.825022	5.2539	6.06242	0.259443	0.367403	0.676491	4.04711	0.434446	3.21964	5.15e-06	0.00354548	UP
NONRATT001083.2	1:174330933-174338548	523	0	33	32	0	0	0	0	2.98796	2.88478	0	0	0	1.95758	0	1	5.17e-06	0.00354548	UP
NONRATT021496.2	4:100231318-100231774	457	11	12	8	150	27	100	1.00099	1.24348	0.825403	14.4879	2.68575	10.0736	1.02329	9.08241	-3.14986	6.42e-06	0.00426612	DOWN
NONRATT014914.2	2:20431367-20679758	816	0	0	0	7	7	7	0	0	0	0.37866	0.389962	0.394938	0	0.387853	-1	7.07e-06	0.00428314	DOWN
NONRATT017469.2	20:50475092-50476777	1686	13	4	7	0	0	0	0.32065	0.112341	0.19575	0	0	0	0.20958	0	1	7.12e-06	0.00428314	UP
MSTRG.15013.1	3:164904272-164908006	434	31	29	0	0	0	0	2.97048	3.16428	0	0	0	0	2.04492	0	1	7.39e-06	0.00428314	UP
NONRATT003056.2	1:174949528-174953758	455	32	0	26	0	0	0	2.92486	0	2.69414	0	0	0	1.873	0	1	7.43e-06	0.00428314	UP
MSTRG.5414.4	12:9285851-9294306	8434	0	71	795	0	0	2	0	0.398645	4.44427	0	0	0.0109166	1.6143	0.00363886	8.79321	7.46e-06	0.00428314	UP
NONRATT010176.2	14:108321359-108337859	2133	33	60	174	8	13	14	0.643409	1.33205	3.84614	0.165543	0.277061	0.302153	1.94053	0.248252	2.96657	7.93e-06	0.00443287	UP
NONRATT002323.2	1:77070746-77080337	380	7	4	8	42	22	80	0.766104	0.498441	0.992656	4.87862	2.63177	9.69175	0.7524	5.73404	-2.92998	8.67e-06	0.0047227	DOWN
NONRATT006078.2	10:90250274-90251813	1540	5	1	5	112	5	101	0.135035	0.030748	0.153073	3.21017	0.147579	3.01924	0.106285	2.12566	-4.3219	9.12e-06	0.00484384	DOWN
NONRATT001441.2	1:220891629-220892374	746	0	0	0	24	0	40	0	0	0	1.42004	0	2.46844	0	1.29616	-1	1.01e-05	0.00522544	DOWN
NONRATT026921.2	7:104669170-104670024	409	23	0	31	0	0	0	2.33869	0	3.57363	0	0	0	1.97077	0	1	1.06e-05	0.00527769	UP
NONRATT004044.2	10:852982-859183	739	0	0	9	29	28	31	0	0	0.574204	1.73216	1.72237	1.93114	0.191401	1.79522	-3.22949	1.07e-05	0.00527769	DOWN
NONRATT025221.2	6:107531506-107536350	731	0	47	17	0	0	0	0	3.0447	1.09651	0	0	0	1.3804	0	1	1.23e-05	0.00592615	UP
NONRATT000004.2	1:1702209-1702943	735	85	91	23	6	16	6	4.80938	5.86293	1.47538	0.360309	0.989534	0.375798	4.04923	0.575213	2.81548	1.42e-05	0.00655278	UP
NONRATT021928.2	4:170914380-170931969	753	1	1	1	33	78	1	0.0552228	0.0628843	0.0625861	1.93441	4.70882	0.0611667	0.060231	2.2348	-5.21349	1.42e-05	0.00655278	DOWN
MSTRG.2420.1	1:229055819-229068290	4819	1296	1335	169	90	116	140	11.1843	13.1186	1.65347	0.824358	1.09424	1.33742	8.6521	1.08534	2.99491	1.57e-05	0.0070968	UP
MSTRG.462.3	1:55480009-55487860	1689	49	88	83	16	21	15	1.20649	2.46726	2.31695	0.418146	0.565202	0.408852	1.9969	0.464067	2.10536	1.99e-05	0.00878774	UP
NONRATT023587.2	5:141415070-141417193	2124	59	41	32	56	696	824	1.15521	0.914087	0.71033	1.16377	14.8959	17.8596	0.926542	11.3064	-3.60914	2.28e-05	0.00987579	DOWN
NONRATT002685.2	1:102749535-102753098	1417	111	142	53	17	20	26	3.25771	4.74548	1.76347	0.529545	0.641624	0.844683	3.25555	0.67195	2.27648	2.33e-05	0.00988194	UP
NONRATT001846.2	1:267505430-267508831	870	1	0	2	58	111	0	0.0477963	0	0.108393	2.94267	5.79982	0	0.0520632	2.91417	-5.80667	2.46e-05	0.0102485	DOWN
MSTRG.450.5	1:54909812-54931503	793	0	50	38	0	1	1	0	2.98579	2.25933	0	0.057308	0.0580814	1.74837	0.0384631	5.50639	3e-05	0.0122696	UP
NONRATT019066.2	3:3453400-3462447	646	145	8	96	8	7	10	9.33459	0.586401	7.00654	0.546598	0.492583	0.712619	5.64251	0.583933	3.27246	3.41e-05	0.0136562	UP
NONRATT005775.2	10:67866932-67869199	2268	69	68	67	309	294	261	1.26523	1.4198	1.39284	6.01377	5.89271	5.2978	1.35929	5.73476	-2.07688	3.54e-05	0.0137613	DOWN
MSTRG.2442.8	1:234629681-234640655	2811	0	0	0	602	0	2	0	0	0	9.45293	0	0.0327536	0	3.1619	-1	3.56e-05	0.0137613	DOWN
NONRATT011218.2	15:109338763-109339329	567	35	1	29	1	1	1	2.56712	0.083513	2.41148	0.0778837	0.0801503	0.081232	1.68737	0.0797553	4.40305	4.04e-05	0.0150782	UP
NONRATT016334.2	2:122476731-122504523	2079	47	0	0	654	685	675	0.940159	0	0	13.8853	14.9778	14.9468	0.313386	14.6033	-5.5422	4.04e-05	0.0150782	DOWN
NONRATT027060.2	7:117566368-117567410	662	6	64	0	0	0	0	0.376944	4.57811	0	0	0	0	1.65168	0	1	4.64e-05	0.0170094	UP
NONRATT023983.2	6:2610694-2611108	415	18	21	3	1	1	1	1.80378	2.39623	0.340794	0.10641	0.109507	0.110984	1.5136	0.108967	3.79602	5.46e-05	0.0194855	UP
NONRATT020068.2	3:177196687-177201486	775	0	1	0	4	10	12	0	0.0610992	0	0.227808	0.586568	0.712803	0.0203664	0.50906	-4.64357	5.5e-05	0.0194855	DOWN
NONRATT003829.2	1:264298811-264303479	435	1	3	348	1	1	1	0.0955925	0.326565	37.7187	0.101517	0.104472	0.105882	12.7136	0.103957	6.93425	6.18e-05	0.0215439	UP
NONRATT011799.2	16:9620010-9620782	773	0	15	19	0	0	0	0	0.91892	1.15886	0	0	0	0.692594	0	1	7.11e-05	0.0243612	UP
NONRATT019154.2	3:9873420-9892240	515	0	0	7	24	15	19	0	0	0.640843	2.05699	1.324	1.69843	0.213614	1.69314	-2.98662	7.4e-05	0.0249703	DOWN
NONRATT020679.2	4:118803633-118806796	3164	86	98	95	107	994	1242	1.13037	1.46674	1.41564	1.49271	14.2811	18.071	1.33758	11.2816	-3.07627	7.82e-05	0.0259735	DOWN
MSTRG.11448.2	2:45690973-45749139	4731	52	1	1	247	497	452	0.457101	0.0100089	0.00996138	2.30449	4.77545	4.39829	0.159024	3.82608	-4.58855	7.99e-05	0.0261318	DOWN
NONRATT013424.2	18:44642285-44644762	2478	59	73	24	14	10	12	0.990179	1.39503	0.45665	0.249384	0.183451	0.222931	0.947285	0.218588	2.11558	8.6e-05	0.0276961	UP
NONRATT004914.2	10:89352835-89356562	551	5	6	6	83	134	4	0.377412	0.515628	0.513443	6.64899	11.0551	0.334194	0.468828	6.01276	-3.6809	9.23e-05	0.0292786	DOWN
MSTRG.6537.3	13:86642989-86650178	7156	0	0	642	0	0	0	0	0	4.22992	0	0	0	1.40997	0	1	9.8e-05	0.0302337	UP
MSTRG.11449.2	2:45720105-45726588	6454	0	0	641	0	0	0	0	0	4.68269	0	0	0	1.5609	0	1	9.82e-05	0.0302337	UP
ENSRNOT00000080938	15:98619241-98621413	1196	16	15	0	0	0	0	0.556358	0.593917	0	0	0	0	0.383425	0	1	9.98e-05	0.0303036	UP
NONRATT029655.2	9:97355925-97366428	1062	107	37	14	6	11	7	4.19005	1.64982	0.621533	0.249366	0.470843	0.303456	2.1538	0.341222	2.65811	0.000108059	0.0323386	UP
NONRATT022927.2	5:173140300-173141564	1265	254	201	20	33	10	16	8.35031	7.52434	0.745435	1.15147	0.35936	0.582264	5.54003	0.697699	2.98922	0.000111626	0.0329421	UP
MSTRG.4913.6	11:57265790-57277305	11453	0	0	0	1289	0	0	0	0	0	4.96781	0	0	0	1.65594	-1	0.000122403	0.0356276	DOWN
NONRATT008581.2	13:110681156-110684204	3049	26	46	29	279	240	65	0.354632	0.71444	0.448446	4.03903	3.5782	0.981423	0.505839	2.86622	-2.5024	0.000126142	0.0361946	DOWN
MSTRG.11575.7	2:78174394-78184906	10456	474	0	0	0	0	0	1.88526	0	0	0	0	0	0.628421	0	1	0.000127758	0.0361946	UP
NONRATT007215.2	12:2170727-2172383	320	0	0	0	2	8	8	0	0	0	0.275861	1.13642	1.15088	0	0.854387	-1	0.000132244	0.0369727	DOWN
MSTRG.2665.2	1:260747355-260763495	15866	0	0	0	783	0	0	0	0	0	2.17834	0	0	0	0.726113	-1	0.0001475	0.0407023	DOWN
NONRATT021350.2	4:66443482-66446814	2625	0	0	0	0	0	656	0	0	0	0	0	11.5046	0	3.83488	-1	0.000155821	0.0419987	DOWN
MSTRG.5414.3	12:9285846-9294298	8425	0	0	0	0	0	652	0	0	0	0	0	3.56267	0	1.18756	-1	0.000156151	0.0419987	DOWN
MSTRG.22617.3	9:76024322-76036596	12231	0	0	0	644	0	0	0	0	0	2.3241	0	0	0	0.7747	-1	0.000160199	0.0425487	DOWN
NONRATT012868.2	17:21325481-21353205	529	0	21	9	0	0	0	0	1.87984	0.802148	0	0	0	0.893997	0	1	0.00018227	0.0477188	UP
NONRATT001152.2	1:190672622-190674851	2230	0	302	0	0	0	0	0	6.41303	0	0	0	0	2.13768	0	1	0.000184442	0.0477188	UP
NONRATT014240.2	19:39215355-39216578	1224	0	0	0	0	0	442	0	0	0	0	0	16.6241	0	5.54138	-1	0.000186402	0.0477188	DOWN
MSTRG.15836.2	4:100801983-100809370	5094	0	0	0	422	0	0	0	0	0	3.65666	0	0	0	1.21889	-1	0.000195348	0.0494138	DOWN
MSTRG.11597.1	2:85100374-85103866	3441	0	0	192	0	0	0	0	0	2.63077	0	0	0	0.876925	0	1	0.000203166	0.0499283	UP
NONRATT003607.2	1:229205987-229206390	404	0	0	188	0	0	0	0	0	21.9403	0	0	0	7.31344	0	1	0.000206126	0.0499283	UP
MSTRG.13241.2	20:20121041-20125060	3921	0	241	0	0	0	0	0	2.9106	0	0	0	0	0.970199	0	1	0.000206532	0.0499283	UP
NONRATT008750.2	13:52260456-52261703	1248	0	0	0	14	0	14	0	0	0	0.495171	0	0.516421	0	0.337197	-1	0.000206781	0.0499283	DOWN
MSTRG.17489.3	5:140391195-140397004	749	0	0	0	0	0	332	0	0	0	0	0	20.4058	0	6.80194	-1	0.000214789	0.0508849	-
NONRATT021402.2	4:78905428-78924188	1813	192	0	0	0	0	0	4.40416	0	0	0	0	0	1.46805	0	1	0.0002176	0.0508849	-
MSTRG.6245.1	13:50897600-50901069	547	101	141	7	6	15	9	7.6788	12.2066	0.603353	0.484144	1.24655	0.757478	6.82957	0.82939	3.04167	0.000218093	0.0508849	-
NONRATT016429.2	2:152785960-152788350	931	12	13	0	0	0	0	0.536019	0.661247	0	0	0	0	0.399089	0	1	0.000221904	0.0508849	-
NONRATT019651.2	3:118109394-118111481	2088	5	8	17	405	30	17	0.0995948	0.181425	0.383882	8.5616	0.653125	0.374819	0.221634	3.19652	-3.85025	0.000222717	0.0508849	-
MSTRG.11664.1	2:98272319-98276120	3359	0	0	168	0	0	0	0	0	2.35812	0	0	0	0.786039	0	1	0.000228288	0.0515072	-
ENSRNOT00000090546	2:25535712-25537531	802	32	36	10	6	5	6	1.65936	2.12564	0.58786	0.330208	0.283382	0.344403	1.45762	0.319331	2.19049	0.000230289	0.0515072	-
MSTRG.10244.2	18:53907658-53909152	1414	0	0	156	0	0	0	0	0	5.20166	0	0	0	1.73389	0	1	0.000238415	0.0525569	-
NONRATT007028.2	11:67598428-67618155	385	0	0	0	6	3	5	0	0	0	0.687862	0.354238	0.59792	0	0.546673	-1	0.00023993	0.0525569	-
NONRATT004745.2	10:78111050-78175671	3054	1	1	1	1	55	11	0.0136158	0.0155049	0.0154313	0.0144597	0.818657	0.165819	0.0148507	0.332978	-4.48683	0.000243184	0.0527263	-
NONRATT007865.2	12:23839399-23839816	418	5	3	2	84	3	33	0.497498	0.339846	0.225604	8.87022	0.326272	3.63441	0.354316	4.27697	-3.59348	0.000253791	0.0543644	-
MSTRG.17489.5	5:140391195-140397004	747	0	0	0	0	0	242	0	0	0	0	0	14.9139	0	4.97131	-1	0.000255857	0.0543644	-
NONRATT026123.2	7:121337111-121337713	603	5	8	6	68	6	79	0.344866	0.628217	0.469166	4.97762	0.452344	6.03126	0.48075	3.82041	-2.99037	0.000262591	0.0545679	-
MSTRG.2442.2	1:234629518-234640652	2965	148	0	0	0	0	0	2.07585	0	0	0	0	0	0.69195	0	1	0.000265082	0.0545679	-
NONRATT026305.2	7:142459170-142465000	995	0	24	23	1	1	0	0	1.1422	1.08985	0.044382	0.0456736	0	0.744019	0.0300185	4.63141	0.000267397	0.0545679	-
MSTRG.21232.1	8:64310752-64327301	2259	509	118	4	3	23	7	9.37046	2.47359	0.0834903	0.0586258	0.462823	0.14266	3.97585	0.22137	4.16673	0.000267841	0.0545679	-
NONRATT025511.2	7:11179962-11180499	538	0	0	0	0	0	224	0	0	0	0	0	19.1674	0	6.38914	-1	0.000269655	0.0545679	-
NONRATT015996.2	2:26500019-26501747	1729	8	5	2	0	0	0	0.192425	0.136934	0.0545415	0	0	0	0.127967	0	1	0.000273898	0.0549036	-
NONRATT012705.2	17:1029242-1031079	1838	167	207	19	18	30	18	3.77859	5.33319	0.487378	0.432277	0.741961	0.450834	3.19972	0.541691	2.5624	0.000313198	0.0618444	-
NONRATT025988.2	7:102650147-102723586	463	0	0	0	7	3	4	0	0	0	0.667358	0.294561	0.397712	0	0.453211	-1	0.000314345	0.0618444	-
MSTRG.17489.4	5:140391195-140397004	751	0	0	0	0	0	151	0	0	0	0	0	9.25624	0	3.08541	-1	0.000357025	0.069597	-
NONRATT002462.2	1:85516129-85516986	858	0	113	0	0	0	0	0	6.23665	0	0	0	0	2.07888	0	1	0.00036256	0.0700334	-
NONRATT030412.2	X:3684206-3685515	751	12	11	3	0	2	0	0.664492	0.693632	0.188322	0	0.121087	0	0.515482	0.0403624	3.67484	0.000369079	0.0706503	-
NONRATT013853.2	18:56968115-56969908	1794	0	109	0	0	0	0	0	2.87717	0	0	0	0	0.959055	0	1	0.000375464	0.0712309	-
NONRATT005891.2	10:82047301-82047957	657	104	17	58	15	11	14	6.58303	1.22531	4.16229	1.00775	0.761089	0.980963	3.99021	0.9166	2.1221	0.000387176	0.0722365	-
NONRATT020323.2	4:57716022-57762723	759	15	45	16	4	7	6	0.8219	2.80761	0.993901	0.23261	0.419247	0.363915	1.54114	0.338591	2.18638	0.000387564	0.0722365	-
NONRATT021216.2	4:29083111-29092706	689	0	98	0	0	0	0	0	6.73551	0	0	0	0	2.24517	0	1	0.000425139	0.0782814	-
MSTRG.22910.3	9:113523886-113526916	3001	0	0	0	0	0	123	0	0	0	0	0	1.88685	0	0.628951	-1	0.000427365	0.0782814	-
NONRATT020666.2	4:118328979-118351326	624	12	0	10	0	0	0	0.799733	0	0.755551	0	0	0	0.518428	0	1	0.000435836	0.0791508	-
MSTRG.22041.6	9:4001081-4002181	1017	0	0	0	123	0	0	0	0	0	5.33844	0	0	0	1.77948	-1	0.000440701	0.0793561	-
NONRATT029060.2	8:122954547-122957477	2931	43	20	29	2060	27	40	0.610119	0.323127	0.4665	31.0229	0.418761	0.628269	0.466582	10.69	-4.51798	0.000445715	0.0795844	-
MSTRG.23054.2	KL568257.1:11855-13130	1200	0	50	1	0	0	0	0	1.97311	0.0392727	0	0	0	0.670795	0	1	0.000451565	0.0796816	-
NONRATT023852.2	5:165432095-165436319	684	2	37	0	0	0	0	0.121587	2.56157	0	0	0	0	0.894385	0	1	0.000453759	0.0796816	-
NONRATT002231.2	1:62312797-62314577	1781	0	0	0	0	0	112	0	0	0	0	0	2.89502	0	0.965008	-1	0.000471485	0.0821156	-
NONRATT026744.2	7:54767934-54778815	787	0	0	0	0	17	8	0	0	0	0	0.981955	0.467956	0	0.483304	-1	0.000481206	0.0831273	-
NONRATT003305.2	1:211196227-211205764	755	14	8	0	0	0	0	0.771178	0.501742	0	0	0	0	0.424306	0	1	0.00049454	0.0847417	-
NONRATT012479.2	17:43632393-43632703	311	0	0	0	0	0	105	0	0	0	0	0	15.5427	0	5.18089	-1	0.000511527	0.0869514	-
NONRATT028416.2	8:39361215-39362399	1185	14	18	9	3	4	3	0.491341	0.719308	0.35809	0.11176	0.15344	0.116565	0.522913	0.127255	2.03885	0.000522539	0.0881182	-
NONRATT002457.2	1:85405753-85408391	644	142	88	72	647	148	702	9.16987	6.4708	5.27126	44.3455	10.4469	50.1821	6.97064	34.9915	-2.32764	0.000591325	0.0989328	-
MSTRG.460.3	1:55404072-55466948	1571	3	16	243	9	0	4	0.0794069	0.482289	7.29283	0.252872	0	0.117213	2.61818	0.123362	4.4076	0.000602659	0.100041	-
NONRATT015639.2	2:205525187-205534214	365	4	5	6	5	7	291	0.455701	0.648656	0.775087	0.604688	0.871804	36.7027	0.626482	12.7264	-4.34441	0.000625837	0.103084	-
NONRATT023980.2	6:2262820-2280619	677	10	0	10	0	0	0	0.61428	0	0.696401	0	0	0	0.436894	0	1	0.00063417	0.103653	-
NONRATT001948.2	1:5238109-5238882	774	0	0	71	0	0	0	0	0	4.32496	0	0	0	1.44165	0	1	0.000645978	0.104777	-
NONRATT025512.2	7:11180519-11182339	1821	0	0	0	0	0	85	0	0	0	0	0	2.14885	0	0.716285	-1	0.000654445	0.105346	-
NONRATT022693.2	5:150725719-150741414	640	3	0	27	0	0	0	0.194919	0	1.98908	0	0	0	0.727999	0	1	0.000660299	0.105422	-
NONRATT010164.2	14:104502715-104503739	1025	2	3	2	9	72	3	0.0811371	0.138591	0.0920022	0.387573	3.19315	0.13476	0.10391	1.23849	-3.57518	0.000668799	0.105422	-
NONRATT021426.2	4:81235301-81236574	497	0	0	0	0	5	22	0	0	0	0	0.457288	2.03778	0	0.831688	-1	0.000674015	0.105422	-
NONRATT005190.2	10:7056136-7071555	849	0	6	16	0	0	0	0	0.334642	0.88854	0	0	0	0.407727	0	1	0.000674766	0.105422	-
MSTRG.22618.1	9:76037652-76040150	2479	0	0	175	1	0	0	0	0	3.32834	0.0178137	0	0	1.10945	0.00593789	7.54567	0.000686603	0.106489	-
MSTRG.11562.3	2:68896418-68897809	1340	0	0	0	0	80	0	0	0	0	0	2.7139	0	0	0.904634	-1	0.000709987	0.109317	-
NONRATT001683.2	1:251488140-251490990	2851	107	100	135	199	165	2896	1.5608	1.66098	2.23257	3.08097	2.63086	46.7627	1.81812	17.4915	-3.26614	0.000748294	0.114387	-
MSTRG.12799.3	20:331996-334295	2012	19	12	0	131	38	54	0.39272	0.28244	0	2.87393	0.858561	1.23556	0.225053	1.65602	-2.87938	0.000783649	0.118692	-
NONRATT030901.2	X:15949564-15950451	888	170	18	7	12	6	3	7.96152	0.959888	0.37166	0.596507	0.307166	0.155551	3.09769	0.353074	3.13315	0.000787633	0.118692	-
NONRATT002642.2	1:101449124-101450028	905	15603	1353	1142	557	761	1160	717	70.7964	59.4955	27.1667	38.2249	59.0075	282.431	41.4664	2.76788	0.000841016	0.125844	-
NONRATT005127.2	10:109073182-109078521	687	58	0	0	0	0	0	3.51098	0	0	0	0	0	1.17033	0	1	0.000849792	0.126268	-
NONRATT006603.2	11:64733757-64752504	695	11	0	8	0	0	0	0.658202	0	0.542747	0	0	0	0.400316	0	1	0.000858148	0.126625	-
NONRATT021201.2	4:27776824-27778424	1601	0	0	59	0	0	0	0	0	1.73751	0	0	0	0.579169	0	1	0.000890594	0.129034	-
NONRATT010468.2	15:37156409-37171290	378	1	0	0	0	1	85	0.110007	0	0	0	0.120225	10.352	0.0366691	3.49075	-6.57283	0.000893877	0.129034	-
NONRATT008422.2	13:83986790-83988591	1802	97	60	8	12	8	12	2.23861	1.57672	0.209328	0.29395	0.201806	0.306561	1.34155	0.267439	2.32662	0.000896065	0.129034	-
NONRATT017153.2	20:5567751-5568138	388	0	0	0	70	0	0	0	0	0	7.96335	0	0	0	2.65445	-1	0.000898765	0.129034	-
NONRATT018129.2	3:35230841-35257416	4096	398	368	29	0	0	35	4.04094	4.25451	0.333816	0	0	0.393373	2.87642	0.131124	4.45527	0.000904857	0.129036	-
NONRATT029082.2	8:128610234-128616350	1926	0	0	0	12	0	8	0	0	0	0.275025	0	0.191216	0	0.155414	-1	0.000928443	0.131238	-
NONRATT002972.2	1:164922060-164931792	410	7	12	0	0	0	0	0.710048	1.38602	0	0	0	0	0.69869	0	1	0.000932648	0.131238	-
NONRATT022703.2	5:151413382-151417689	528	10	4	3	0	1	0	0.787628	0.358726	0.267859	0	0.0860705	0	0.471405	0.0286902	4.03834	0.000953188	0.133246	-
NONRATT009776.2	14:16372870-16377736	1453	6	14	13	15	353	18	0.171739	0.456279	0.421845	0.45567	11.0438	0.570292	0.349954	4.02326	-3.52313	0.000973194	0.13453	-
NONRATT005603.2	10:56578985-56582007	484	0	54	0	0	0	0	0	5.28335	0	0	0	0	1.76112	0	1	0.00097504	0.13453	-
NONRATT005621.2	10:57059768-57070891	2623	2	7	166	7	3	1	0.0317063	0.126368	2.98384	0.117799	0.0519946	0.0175595	1.0473	0.062451	4.06781	0.000987343	0.135349	-
NONRATT013328.2	18:28370907-28383133	2137	147	7	6	8	2	5	2.8607	0.155107	0.132385	0.165233	0.0425533	0.107721	1.0494	0.105169	3.31878	0.00101078	0.137673	-
NONRATT016384.2	2:143892935-143906198	755	0	16	5	0	0	0	0	1.00355	0.312228	0	0	0	0.438591	0	1	0.00103372	0.139901	-
NONRATT021717.2	4:146778556-146779157	602	18	167	218	23	30	29	1.24347	13.1366	17.0736	1.68644	2.26532	2.21768	10.4846	2.05648	2.35002	0.0010481	0.14095	-
NONRATT019836.2	3:150062897-150063924	1028	21	7	11	4	3	2	0.849531	0.322435	0.504512	0.171742	0.132667	0.0895627	0.558826	0.131324	2.08927	0.00106052	0.141723	-
NONRATT014270.2	19:42121038-42123062	686	15	7	10	0	5	0	0.909361	0.483182	0.687265	0	0.3313	0	0.69327	0.110433	2.65024	0.00108476	0.144056	-
NONRATT017073.2	20:4093100-4093555	456	3	4	5	21	10	22	0.273571	0.415367	0.516956	2.03271	0.996909	2.221	0.401965	1.75021	-2.12238	0.00112667	0.148692	-
NONRATT011596.2	16:71241391-71245612	623	0	10	7	0	0	0	0	0.760137	0.52975	0	0	0	0.429962	0	1	0.0011476	0.149647	-
NONRATT026516.2	7:12414304-12415394	1091	21	22	27	10	151	411	0.800475	0.954893	1.16683	0.404563	6.29162	17.3426	0.974065	8.01294	-3.04024	0.00115469	0.149647	-
NONRATT000603.2	1:91365198-91366164	967	21	5	10	29	335	13	0.903121	0.244839	0.487553	1.32375	15.7481	0.618905	0.545171	5.89692	-3.43518	0.00115503	0.149647	-
NONRATT005205.2	10:9867889-9868393	505	0	1	0	5	7	4	0	0.0937661	0	0.437052	0.630116	0.364635	0.0312554	0.477268	-3.93262	0.00118669	0.152817	-
NONRATT027425.2	8:12872779-12875701	713	451	310	0	26	10	14	26.3055	20.5889	0	1.60958	0.637574	0.903917	15.6315	1.05036	3.89551	0.0012083	0.154663	-
NONRATT012180.2	17:822760-823888	1129	102	0	0	0	1	0	3.7572	0	0	0	0.0402526	0	1.2524	0.0134175	6.54443	0.00123873	0.157608	-
NONRATT022689.2	5:150080999-150082385	1387	18	18	18	33	48	160	0.539704	0.61455	0.611877	1.05019	1.57316	5.31058	0.58871	2.64464	-2.16744	0.00128784	0.162881	-
NONRATT017960.2	3:7729408-7731816	2409	23	24	22	131	52	63	0.397063	0.471769	0.430584	2.40031	0.981235	1.20394	0.433139	1.52849	-1.81921	0.0013053	0.164113	-
NONRATT000377.2	1:78021605-78023371	666	0	0	0	0	10	7	0	0	0	0	0.682568	0.483889	0	0.388819	-1	0.00135049	0.168796	-
NONRATT011233.2	16:1950295-1954629	4335	441	309	266	148	104	121	4.23067	3.37545	2.89308	1.50697	1.09057	1.28498	3.49973	1.29417	1.43521	0.00141593	0.17594	-
NONRATT010218.2	14:115314248-115337037	1636	0	0	0	52	0	0	0	0	0	1.40297	0	0	0	0.467656	-1	0.00143951	0.17783	-
NONRATT019483.2	3:82324815-82331439	892	7	8	4	8	240	6	0.326367	0.42468	0.21144	0.395855	12.2309	0.309654	0.320829	4.31213	-3.74852	0.00146031	0.179039	-
NONRATT028551.2	8:55176868-55178099	628	12	1	0	22	23	34	0.794639	0.0754011	0	1.5463	1.66483	2.49243	0.290013	1.90119	-2.71271	0.00146615	0.179039	-
MSTRG.12799.1	20:330089-334272	342	0	8	6	28	12	32	0	1.10765	0.827213	3.61375	1.59497	4.30752	0.644953	3.17208	-2.29816	0.00147698	0.179331	-
NONRATT023233.2	5:64214729-64219091	498	12	12	11	1	6	1	1.00207	1.1411	1.04144	0.0886748	0.547718	0.092487	1.06154	0.24296	2.12737	0.00149152	0.180067	-
NONRATT017624.2	20:7476720-7478481	566	18	0	3	0	0	0	1.32256	0	0.249876	0	0	0	0.524146	0	1	0.00156023	0.187299	-
NONRATT014176.2	19:32295508-32312372	733	66	70	14	4	22	4	3.74453	4.52226	0.900503	0.240861	1.36435	0.251215	3.05577	0.61881	2.30397	0.00157294	0.187763	-
NONRATT026579.2	7:15158831-15172490	1040	21	2	26	3	2	3	0.839729	0.0910613	1.17869	0.127342	0.0874389	0.132816	0.703159	0.115866	2.6014	0.00158642	0.188314	-
NONRATT021997.2	5:74369-152115	557	41	0	0	0	0	0	3.06121	0	0	0	0	0	1.0204	0	1	0.00160905	0.189939	-
MSTRG.6241.2	13:50618584-50636148	1060	66	27	81	25	20	11	2.58938	1.20622	3.60286	1.04105	0.857718	0.477746	2.46615	0.792171	1.63838	0.00163159	0.190841	-
ENSRNOT00000090050	20:3403204-3403731	528	0	0	42	0	0	0	0	0	3.75048	0	0	0	1.25016	0	1	0.00163465	0.190841	-
NONRATT021076.2	4:2114378-2201733	3602	33	330	27	20	25	22	0.381008	4.33842	0.353417	0.245086	0.315506	0.28117	1.69095	0.280587	2.59131	0.00166404	0.193211	-
NONRATT025711.2	7:29479207-29480053	847	5115	2428	756	960	609	600	251.143	135.746	42.0828	50.0287	32.6847	32.6111	142.991	38.4415	1.89518	0.00170759	0.196447	-
NONRATT017345.2	20:21839393-21841227	390	3	8	7	20	21	22	0.319867	0.97132	0.846242	2.26359	2.44776	2.59686	0.712476	2.43607	-1.77364	0.0017104	0.196447	-
NONRATT017117.2	20:5048783-5050863	563	9	6	0	0	0	0	0.664805	0.504638	0	0	0	0	0.389814	0	1	0.0017876	0.20421	-
NONRATT004661.2	10:70310274-70312073	1800	4	5	4	4	139	7	0.0924061	0.131533	0.10478	0.098084	3.51038	0.179039	0.109573	1.2625	-3.52632	0.00181235	0.20593	-
NONRATT025433.2	6:147089844-147138897	396	0	0	0	0	6	10	0	0	0	0	0.688797	1.16251	0	0.617101	-1	0.00182764	0.206005	-
NONRATT022283.2	5:71822880-71824079	1200	1	2	2	3	1	81	0.0346523	0.0789198	0.0785852	0.110363	0.037871	3.10743	0.0640524	1.08522	-4.08259	0.0018324	0.206005	-
NONRATT005132.2	10:109179905-109183087	400	0	38	0	0	0	0	0	4.49866	0	0	0	0	1.49955	0	1	0.0018648	0.208544	-
NONRATT001104.2	1:175976695-175980552	1205	0	0	0	0	43	0	0	0	0	0	1.62216	0	0	0.540718	-1	0.00191378	0.211906	-
NONRATT015220.2	2:121153325-121193232	960	0	0	0	11	6	0	0	0	0	0.505769	0.284129	0	0	0.263299	-1	0.00191481	0.211906	-
MSTRG.460.5	1:55404072-55466948	1569	1	0	69	1	0	1	0.0265027	0	2.07343	0.0281454	0	0.0293553	0.699978	0.0191669	5.19062	0.00194047	0.213633	-
NONRATT017620.2	20:7151596-7152345	750	4	2	3	11	12	12	0.221775	0.126272	0.188573	0.647384	0.727308	0.736563	0.178873	0.703752	-1.97613	0.00196619	0.215348	-
NONRATT011887.2	16:21023923-21027026	401	25	30	19	9	8	10	2.59274	3.54277	2.23392	0.990679	0.906867	1.14801	2.78981	1.01519	1.45842	0.0019994	0.217539	-
NONRATT023367.2	5:105003831-105004441	611	133	168	20	26	34	18	9.05255	13.0206	1.54333	1.87828	2.52954	1.35619	7.87216	1.92134	2.03465	0.00200666	0.217539	-
NONRATT030524.2	X:40307898-40309047	1150	3	6	4	9	15	42	0.108477	0.247053	0.164004	0.345446	0.592924	1.68133	0.173178	0.873232	-2.33411	0.00203064	0.21902	-
NONRATT021950.2	4:176581895-176583751	419	5	40	3	0	0	4	0.49631	4.52069	0.337541	0	0	0.439477	1.78485	0.146492	3.6069	0.00204099	0.219025	-
NONRATT003648.2	1:240561952-240562495	544	6	4	14	0	3	0	0.458707	0.348176	1.21336	0	0.250702	0	0.673415	0.0835672	3.01049	0.0020668	0.220445	-
NONRATT010252.2	15:4255186-4270395	704	25	11	11	3	7	3	1.47683	0.739939	0.736703	0.188119	0.452001	0.196206	0.984491	0.278775	1.82028	0.00207497	0.220445	-
NONRATT026525.2	7:12561083-12561534	452	4	2	5	16	48	4	0.367989	0.209522	0.521531	1.5625	4.82737	0.407391	0.366347	2.26575	-2.62871	0.00212658	0.224804	-
NONRATT011066.2	15:52307917-52325990	423	6	5	7	2	1	0	0.589921	0.559715	0.780223	0.208689	0.107435	0	0.643286	0.105375	2.60993	0.00216428	0.227656	-
NONRATT022252.2	5:62747800-62750633	755	0	0	0	6	9	0	0	0	0	0.350764	0.541914	0	0	0.297559	-1	0.00220467	0.230134	-
NONRATT023334.2	5:92862229-92865113	2885	14	27	1990	29	59	44	0.201816	0.443187	32.5218	0.443696	0.929638	0.702113	11.0556	0.691816	3.99824	0.00220949	0.230134	-
NONRATT016225.2	2:88404186-88408022	520	73	85	72	33	28	3	5.8382	7.74066	6.52825	2.80118	2.44776	0.265633	6.70237	1.83819	1.86638	0.00223351	0.231501	-
ENSRNOT00000082061	8:114037763-114039980	1077	6	8	0	0	0	0	0.231696	0.351732	0	0	0	0	0.194476	0	1	0.00224878	0.231951	-
NONRATT020594.2	4:112697961-112700152	1235	13	9	27	5	3	6	0.437746	0.345112	1.03078	0.178714	0.110431	0.223653	0.604545	0.170932	1.82242	0.00227489	0.233512	-
NONRATT012845.2	17:18333192-18333919	728	6	4	6	13	7	87	0.34277	0.260175	0.388608	0.788205	0.4371	5.50156	0.330518	2.24229	-2.76217	0.00237577	0.24159	-
NONRATT005842.2	10:75032378-75037887	449	23	35	3	5	4	4	2.13034	3.69133	0.314988	0.491562	0.40496	0.410113	2.04556	0.435545	2.2316	0.00237633	0.24159	-
NONRATT005357.2	10:25860700-25861923	1224	36	20	51	9	17	12	1.22315	0.773762	1.96453	0.324561	0.631372	0.451326	1.32048	0.469086	1.49314	0.00241442	0.2434	-
NONRATT017305.2	20:13819699-13824926	923	36	71	217	15	29	39	1.62204	3.64265	11.0847	0.717323	1.42826	1.94517	5.44981	1.36358	1.9988	0.00241705	0.2434	-
NONRATT004936.2	10:90350208-90351170	963	34	16	4	5	4	3	1.4683	0.786788	0.195851	0.229191	0.188813	0.143436	0.81698	0.187147	2.12613	0.00246609	0.246235	-
ENSRNOT00000091800	1:226794183-226812454	954	0	0	0	3	1	11	0	0	0	0.138821	0.0476365	0.530829	0	0.239096	-1	0.00246837	0.246235	-
NONRATT010212.2	14:114525973-114528157	1093	34	26	180	16	22	20	1.29366	1.12644	7.76462	0.646157	0.914978	0.842364	3.39491	0.801166	2.0832	0.00255593	0.253778	-
NONRATT016224.2	2:88402888-88403723	836	126	184	180	81	47	9	6.26793	10.4226	10.1516	4.2767	2.55565	0.495622	8.94736	2.44266	1.87301	0.00257011	0.253998	-
NONRATT015490.2	2:189871607-189877777	675	0	0	0	38	0	0	0	0	0	2.48493	0	0	0	0.828309	-1	0.00265241	0.260861	-
NONRATT007757.2	12:12409871-12411750	1880	31	21	13	1370	7	9	0.685737	0.528955	0.326032	32.1658	0.16926	0.220394	0.513575	10.8518	-4.40122	0.0026645	0.260861	-
NONRATT027028.2	7:116789980-116810822	821	0	0	0	7	0	8	0	0	0	0.376354	0	0.448577	0	0.274977	-1	0.00270249	0.260861	-
NONRATT024697.2	6:137071675-137072721	1047	12	0	4	0	0	0	0.476632	0	0.180138	0	0	0	0.218923	0	1	0.0027061	0.260861	-
NONRATT027415.2	8:12160543-12160862	320	9	20	8	3	2	4	1.16964	2.95964	1.17878	0.413861	0.284177	0.57544	1.76935	0.424493	2.05941	0.00272043	0.260861	-
NONRATT011260.2	16:4489560-4490270	711	6	2	6	0	1	0	0.350966	0.133198	0.3979	0	0.0639173	0	0.294021	0.0213058	3.7866	0.00272927	0.260861	-
NONRATT028882.2	8:104190378-104202265	962	2	3	5	0	0	0	0.0864506	0.147667	0.245044	0	0	0	0.15972	0	1	0.00274314	0.260861	-
NONRATT007489.2	12:38274348-38286216	743	0	39	1	0	1	0	0	2.48562	0.0634284	0	0.0611645	0	0.849683	0.0203882	5.38112	0.00274855	0.260861	-
NONRATT017137.2	20:5354224-5418017	529	0	0	86	0	1	1	0	0	7.66495	0	0.0859078	0.0870671	2.55498	0.0576583	5.46964	0.00275004	0.260861	-
NONRATT028716.2	8:79688669-79689647	979	377	12	5	21	9	7	16.0147	0.580459	0.240788	0.946799	0.417921	0.329183	5.61198	0.564634	3.31312	0.00278278	0.262793	-
NONRATT029332.2	9:45680708-45681704	997	2	1	3	79	2	2	0.0834158	0.0474944	0.141855	3.49753	0.0912101	0.0923475	0.0909218	1.22703	-3.7544	0.00282747	0.265832	-
NONRATT008391.2	13:79204475-79205290	816	7	4	74	4	4	5	0.356764	0.232117	4.27573	0.216362	0.222827	0.282107	1.62154	0.240432	2.75366	0.00286636	0.268301	-
NONRATT030984.2	X:45518502-45520324	780	0	0	33	0	0	0	0	0	1.99476	0	0	0	0.664922	0	1	0.00289171	0.269487	-
NONRATT013518.2	18:60720044-60721673	1630	1	4	98	3	4	0	0.0255109	0.116201	2.83468	0.0812489	0.11155	0	0.99213	0.0642664	3.94839	0.00294855	0.273582	-
ENSRNOT00000090612	2:31677123-31679871	651	0	1	0	2	6	6	0	0.0727371	0	0.1356	0.418991	0.424288	0.0242457	0.326293	-3.75037	0.00298009	0.273582	-
NONRATT029495.2	9:81373327-81374025	699	28	15	4	3	5	2	1.66586	1.0162	0.269821	0.189464	0.325139	0.131717	0.983962	0.21544	2.19131	0.00298514	0.273582	-
NONRATT016880.2	2:236477973-236480539	727	108	13	71	27	11	3	6.17802	0.846796	4.60456	1.63932	0.687807	0.189999	3.87646	0.839043	2.20792	0.00299547	0.273582	-
NONRATT006698.2	11:81514489-81515535	821	12	17	8	2	5	4	0.607836	0.980546	0.459451	0.107522	0.276824	0.224288	0.682611	0.202878	1.75045	0.00300003	0.273582	-
NONRATT001713.2	1:258002994-258004282	547	3	5	4	19	14	12	0.228059	0.432832	0.344798	1.53316	1.16347	1.00991	0.33523	1.23552	-1.88189	0.00304034	0.274607	-
NONRATT022470.2	5:127782205-127784092	1888	16	0	13	2	0	0	0.352439	0	0.324651	0.0467561	0	0	0.225697	0.0155854	3.85612	0.00304826	0.274607	-
MSTRG.458.1	1:55366922-55467548	465	6	25	35	0	4	9	0.536638	2.5459	3.54875	0	0.391026	0.891054	2.21043	0.42736	2.3708	0.00305004	0.274607	-
NONRATT001520.2	1:225202501-225202736	236	0	3	74	2	0	2	0	0.601931	14.7839	0.374049	0	0.390129	5.1286	0.254726	4.33155	0.00310078	0.277567	-
NONRATT020890.2	4:157223277-157224222	946	90	7	46	4	19	5	3.9565	0.350384	2.29261	0.186629	0.912991	0.24334	2.19983	0.447653	2.29694	0.00312205	0.277567	-
NONRATT003393.2	1:218509478-218512679	751	11	10	13	4	2	5	0.609122	0.63058	0.816167	0.235088	0.121087	0.306524	0.685289	0.2209	1.63332	0.00312211	0.277567	-
MSTRG.21471.1	8:84511121-84512100	372	11	14	22	8	5	1	1.22971	1.78219	2.78838	0.9492	0.610947	0.123813	1.93342	0.56132	1.78426	0.00317081	0.279362	-
MSTRG.9923.2	18:6455565-6459444	1493	1	1	0	0	0	93	0.0278518	0.0317159	0	0	0	2.86761	0.0198559	0.955871	-5.58917	0.00317143	0.279362	-
NONRATT001590.2	1:57382302-57390349	739	17	7	9	46	32	26	0.956681	0.448529	0.574204	2.74753	1.96842	1.61964	0.659805	2.11186	-1.67841	0.00318246	0.279362	-
NONRATT026655.2	7:29959586-29961154	1569	62	56	40	15	26	21	1.64335	1.69015	1.20201	0.421982	0.753281	0.616165	1.51184	0.597143	1.34015	0.00319563	0.279362	-
NONRATT026383.2	7:2824346-2825555	539	72	24	37	9	19	17	5.55525	2.10852	3.2365	0.737036	1.60239	1.45199	3.63342	1.26381	1.52355	0.00320804	0.279362	-
NONRATT007428.2	12:29268646-29269748	1103	6	3	4	1	0	0	0.226235	0.12879	0.170992	0.0400363	0	0	0.175339	0.0133454	3.71573	0.00322162	0.2794	-
NONRATT016307.2	2:118715225-118717190	1966	142	17	16	18	10	9	3.00376	0.409475	0.383708	0.404133	0.231226	0.210753	1.26565	0.282037	2.16592	0.00329595	0.284685	-
NONRATT002861.2	1:146748696-146812576	643	30	3	5	0	4	0	1.94029	0.220926	0.366613	0	0.282779	0	0.842608	0.0942597	3.16015	0.003365	0.287857	-
NONRATT005145.2	10:109665664-109670626	343	30	0	0	0	0	0	3.63733	0	0	0	0	0	1.21244	0	1	0.00338308	0.287857	-
NONRATT024883.2	6:27565694-27582980	683	0	29	0	0	0	0	0	2.01068	0	0	0	0	0.670228	0	1	0.00339853	0.287857	-
NONRATT016953.2	2:257453546-257484590	1770	0	0	0	0	1	23	0	0	0	0	0.0256753	0.598211	0	0.207962	-1	0.00339858	0.287857	-
NONRATT005712.2	10:63776272-63778822	630	3	3	1	11	10	10	0.198013	0.225485	0.0748052	0.770695	0.721572	0.730718	0.166101	0.740995	-2.1574	0.00340041	0.287857	-
NONRATT021479.2	4:99250836-99257480	3081	54	88	84	206	209	236	0.72889	1.35255	1.28545	2.95126	3.08365	3.52629	1.12229	3.18707	-1.50578	0.00343607	0.289032	-
NONRATT028250.2	8:7211003-7212175	1173	45	21	33	121	75	106	1.59542	0.847772	1.32644	4.55321	2.90653	4.16012	1.25654	3.87329	-1.6241	0.00344151	0.289032	-
NONRATT006699.2	11:81515845-81517078	1234	42	41	35	8	24	12	1.41546	1.57336	1.33725	0.286145	0.884123	0.447668	1.44202	0.539312	1.4189	0.00345669	0.289165	-
NONRATT012613.2	17:76287747-76288470	532	7	4	16	1	2	2	0.547217	0.356029	1.41799	0.0830077	0.170933	0.173065	0.773745	0.142335	2.44257	0.00348354	0.290268	-
NONRATT030693.2	X:115351001-115352258	1258	7	7	102	6	6	7	0.231415	0.263484	3.82284	0.210514	0.216823	0.256176	1.43925	0.227838	2.65923	0.00352395	0.292488	-
NONRATT019151.2	3:9858715-9861656	2942	235	120	161	691	338	567	3.32189	1.93153	2.58018	10.3673	5.22257	8.87235	2.6112	8.15408	-1.64281	0.00356495	0.294739	-
NONRATT011876.2	16:20863141-20868790	684	29	17	5	2	5	6	1.76319	1.17694	0.344637	0.129058	0.332269	0.403818	1.09492	0.288382	1.92478	0.00359358	0.295955	-
NONRATT003329.2	1:213613511-213614052	542	106	12	10	12	8	5	8.13331	1.04847	0.869859	0.977303	0.670948	0.424722	3.35055	0.690991	2.27766	0.00362738	0.29722	-
NONRATT031074.2	X:74371298-74371844	401	25	21	26	5	15	6	2.59274	2.47989	3.05694	0.550402	1.70041	0.688806	2.70986	0.979871	1.46755	0.00363692	0.29722	-
NONRATT003302.2	1:209810349-209810638	290	9	96	26	4	4	18	1.29064	15.6761	4.22702	0.608797	0.626989	2.85736	7.06457	1.36438	2.37236	0.00367216	0.298951	-
NONRATT020488.2	4:84917358-84922345	993	42	17	21	78	75	90	1.75899	0.810703	0.997082	3.4672	3.43339	4.17247	1.18893	3.69102	-1.63436	0.00373746	0.302621	-
NONRATT024258.2	6:64224971-64284660	776	22	29	9	11	4	1	1.179	1.76971	0.546825	0.625693	0.234313	0.0593538	1.16518	0.306453	1.92681	0.00374573	0.302621	-
NONRATT000709.2	1:101688325-101689835	669	10	2	14	23	14	88	0.621626	0.14156	0.986649	1.51754	0.951296	6.05559	0.583278	2.84148	-2.28438	0.00386694	0.310514	-
NONRATT006069.2	10:89998285-90002189	1796	0	27	0	0	0	0	0	0.711912	0	0	0	0	0.237304	0	1	0.00387266	0.310514	-
NONRATT015446.2	2:188562082-188565332	536	28	0	0	0	0	0	2.17246	0	0	0	0	0	0.724153	0	1	0.0039157	0.311387	-
NONRATT028587.2	8:59307818-59313557	373	28	0	0	0	0	0	3.12182	0	0	0	0	0	1.04061	0	1	0.00391638	0.311387	-
NONRATT006692.2	11:77469036-77469763	728	0	0	0	32	0	0	0	0	0	1.94018	0	0	0	0.646728	-1	0.00394075	0.311387	-
NONRATT013349.2	18:29110212-29110741	530	12	13	7	14	18	160	0.941572	1.16155	0.622706	1.16599	1.54386	13.8977	0.908609	5.53584	-2.60707	0.00394217	0.311387	-
NONRATT007318.2	12:16899077-16901500	395	7	7	13	2	2	3	0.737011	0.839147	1.55175	0.223483	0.230219	0.349694	1.04264	0.267798	1.96102	0.00399123	0.313741	-
NONRATT007978.2	12:38852515-38854389	737	6	8	7	26	13	30	0.338584	0.513996	0.447808	1.55716	0.801862	1.87395	0.433463	1.41099	-1.70273	0.0040015	0.313741	-
NONRATT006338.2	10:109188078-109190096	1175	1	0	5	13	6	11	0.0353896	0	0.200623	0.488352	0.232139	0.430988	0.0786708	0.383826	-2.28655	0.00402486	0.314412	-
NONRATT001131.2	1:185538649-185539623	975	306	231	44	60	54	60	13.052	11.2194	2.1277	2.71631	2.51767	2.83298	8.79969	2.68899	1.71039	0.00409368	0.318617	-
NONRATT019429.2	3:72070386-72071866	607	134	132	215	82	69	38	9.18071	10.2979	16.7	5.9629	5.16737	2.88202	12.0595	4.67076	1.36844	0.0041233	0.319642	-
NONRATT026138.2	7:122687527-122688791	1265	10	21	228	17	14	14	0.328749	0.786115	8.4979	0.593174	0.503097	0.509481	3.20425	0.53525	2.5817	0.00413693	0.319642	-
NONRATT017262.2	20:11208783-11211914	283	7	7	7	1	2	2	1.02869	1.17125	1.1662	0.156043	0.32133	0.325337	1.12205	0.26757	2.06814	0.00415968	0.320235	-
NONRATT012772.2	17:9454121-9457662	3542	57	642	471	63	81	147	0.669243	8.58318	6.26959	0.785091	1.03956	1.91059	5.174	1.24508	2.05504	0.00419205	0.321562	-
NONRATT026117.2	7:120893991-120897681	437	8	23	16	6	5	4	0.761332	2.49231	1.72625	0.606011	0.520074	0.421375	1.65996	0.51582	1.68621	0.00421166	0.321904	-
NONRATT009207.2	14:8316256-8368255	1289	3	11	0	0	0	0	0.0967791	0.404125	0	0	0	0	0.166968	0	1	0.00427719	0.324135	-
NONRATT023778.2	5:159540759-159543736	978	25	28	49	12	12	17	1.06308	1.35577	2.36226	0.541614	0.557751	0.800227	1.5937	0.633197	1.33166	0.00429347	0.324135	-
NONRATT010154.2	14:100420767-100425367	994	108	157	140	66	58	46	4.51853	7.47954	6.64062	2.93081	2.65247	2.13045	6.2129	2.57125	1.2728	0.00431039	0.324135	-
NONRATT006298.2	10:105659805-105668642	709	1	3	2	28	8	3	0.0586499	0.200361	0.133007	1.74316	0.512911	0.194822	0.130673	0.816965	-2.64432	0.00431072	0.324135	-
NONRATT009130.2	13:110219279-110220123	845	11	5	21	2	2	5	0.541362	0.280189	1.17172	0.104468	0.107617	0.272425	0.664423	0.161504	2.04054	0.00432134	0.324135	-
NONRATT018140.2	3:38669630-38677637	2263	8	9	12	13	93	22	0.147018	0.18834	0.250007	0.253563	1.86814	0.447536	0.195122	0.856413	-2.13393	0.0043752	0.324135	-
NONRATT030177.2	9:82328003-82331534	1347	56	23	47	21	9	17	1.72894	0.808567	1.64513	0.688134	0.303745	0.581011	1.39421	0.524297	1.41099	0.00438368	0.324135	-
ENSRNOT00000090348	4:118328838-118334020	1107	14	10	16	0	7	4	0.525961	0.427792	0.681455	0	0.287451	0.166342	0.545069	0.151265	1.84937	0.00438458	0.324135	-
NONRATT011852.2	16:20061929-20062759	379	10	8	12	3	4	3	1.09728	0.999512	1.49279	0.349434	0.479754	0.364456	1.19652	0.397882	1.58844	0.00438952	0.324135	-
NONRATT014041.2	19:11467915-11470644	2730	14	19	16	7	409	22	0.213274	0.329572	0.276326	0.113182	6.81038	0.37098	0.273058	2.43151	-3.15458	0.0043934	0.324135	-
NONRATT012080.2	16:73372007-73372659	653	7	7	7	10	96	11	0.445819	0.5076	0.505412	0.675923	6.68298	0.775514	0.486277	2.71147	-2.47923	0.00442623	0.324528	-
NONRATT024289.2	6:76041579-76053744	537	0	0	2	3	6	7	0	0	0.175609	0.246621	0.507939	0.60013	0.0585365	0.451564	-2.94752	0.00442927	0.324528	-
NONRATT011342.2	16:18706167-18709135	2393	1	5	9	0	1	0	0.0173768	0.0989383	0.177324	0	0.0189909	0	0.0978797	0.0063303	3.95066	0.0045608	0.333017	-
NONRATT025596.2	7:12848483-12851105	798	9	3	4	0	0	2	0.469029	0.178015	0.236347	0	0	0.115376	0.294463	0.0384588	2.9367	0.00461085	0.334943	-
NONRATT004771.2	10:82814996-82816736	1640	0	0	0	0	29	0	0	0	0	0	0.803829	0	0	0.267943	-1	0.00463151	0.334943	-
MSTRG.2087.16	1:215927993-215934215	366	1	4	5	4	37	13	0.113614	0.517507	0.644076	0.48238	4.59545	1.63519	0.425066	2.23767	-2.39624	0.00464074	0.334943	-
NONRATT027586.2	8:44991953-44992650	613	28	103	132	38	12	31	1.89957	7.95681	10.1526	2.73626	0.889854	2.32808	6.66967	1.98473	1.74867	0.00465023	0.334943	-
NONRATT017977.2	3:8484882-8496001	2074	35	55	40	20	20	14	0.701812	1.25578	0.90933	0.425651	0.438371	0.310749	0.955641	0.39159	1.28712	0.00467304	0.335449	-
NONRATT010844.2	15:30541404-30544743	3340	76	10	70	21	7	15	0.946291	0.141786	0.988141	0.27752	0.095272	0.206752	0.692072	0.193181	1.84097	0.00469729	0.336054	-
NONRATT007873.2	12:24091393-24092076	684	64	456	24	35	44	33	3.8912	31.5697	1.65436	2.25861	2.92418	2.22103	12.3717	2.46794	2.32567	0.00474537	0.338203	-
MSTRG.9484.1	17:43484688-43486319	698	92	92	53	16	43	29	5.4814	6.24156	3.58001	1.01182	2.80043	1.91267	5.10099	1.90831	1.41848	0.00475917	0.338203	-
NONRATT016544.2	2:187296984-187301977	678	0	0	0	29	0	0	0	0	0	1.888	0	0	0	0.629333	-1	0.00485572	0.343915	-
NONRATT024539.2	6:113267236-113267614	379	10	16	16	44	49	28	1.09728	1.99915	1.99042	5.12441	5.8772	3.40102	1.69562	4.80088	-1.50149	0.00488561	0.344882	-
NONRATT024018.2	6:10305811-10306157	347	4	4	60	4	3	3	0.47934	0.545843	8.15252	0.508793	0.393031	0.398066	3.05924	0.433297	2.81974	0.00497221	0.349124	-
NONRATT010790.2	15:19617848-19620318	2471	28	37	42	48	43	486	0.471242	0.70907	0.801397	0.857427	0.791055	9.05444	0.66057	3.56764	-2.43319	0.00497857	0.349124	-
NONRATT008198.2	13:48812845-48813263	419	8	5	4	152	3	7	0.794039	0.565058	0.45013	16.0125	0.325493	0.76914	0.603076	5.70239	-3.24116	0.00504448	0.351965	-
NONRATT001599.2	1:238855066-238856391	1326	19	25	54	12	15	8	0.595892	0.892793	1.92007	0.399471	0.514225	0.277739	1.13625	0.397145	1.51655	0.0050522	0.351965	-
NONRATT022409.2	5:117590367-117592209	693	6	9	6	0	0	4	0.360082	0.615027	0.408235	0	0	0.265716	0.461115	0.0885718	2.38021	0.00528972	0.367307	-
NONRATT014530.2	19:22621345-22632069	411	91	82	7	22	14	10	9.20787	9.4479	0.803003	2.36272	1.54846	1.12008	6.48626	1.67708	1.95143	0.00534778	0.369846	-
NONRATT030588.2	X:71460662-71478324	579	32	33	31	7	4	22	2.29846	2.69897	2.52438	0.533656	0.314036	1.74918	2.50727	0.865624	1.53431	0.0053611	0.369846	-
NONRATT021604.2	4:120750833-120751672	840	0	2	4	9	9	8	0	0.112743	0.224529	0.472931	0.487078	0.438431	0.112424	0.466147	-2.05183	0.00539317	0.370854	-
NONRATT018222.2	3:55989235-55991229	1995	93	8	8	7	8	7	1.93865	0.189882	0.189077	0.154881	0.182283	0.161539	0.772535	0.166234	2.21639	0.00541883	0.371417	-
NONRATT020875.2	4:153921942-153927715	399	0	0	0	8	0	5	0	0	0	0.884968	0	0.576941	0	0.487303	-1	0.0055221	0.376197	-
NONRATT013989.2	19:561729-563498	872	7	8	2	16	36	13	0.333853	0.434421	0.108145	0.809919	1.87671	0.686331	0.292139	1.12432	-1.94432	0.00553393	0.376197	-
NONRATT007642.2	12:49558790-49561043	2254	15	15	28	4	11	6	0.276762	0.31514	0.585686	0.0783279	0.221844	0.122543	0.392529	0.140905	1.47808	0.00554168	0.376197	-
NONRATT012520.2	17:57074540-57088632	698	58	20	13	4	16	5	3.45565	1.35685	0.878139	0.252939	1.04199	0.329799	1.89688	0.541575	1.8084	0.00557814	0.377466	-
NONRATT004768.2	10:82802253-82814967	1382	18	20	18	134	100	11	0.541657	0.6853	0.61409	4.27983	3.2893	0.366433	0.613682	2.64519	-2.10781	0.00561882	0.378897	-
NONRATT008180.2	13:44974930-44986951	741	40	62	66	18	17	34	2.2449	3.96222	4.19944	1.07223	1.04291	2.11234	3.46885	1.40916	1.29962	0.00563495	0.378897	-
NONRATT021035.2	4:179481388-179482402	1015	51	71	50	15	23	33	2.08962	3.31248	2.32258	0.652305	1.03007	1.49673	2.57489	1.0597	1.28085	0.00584577	0.391833	-
NONRATT021884.2	4:165424759-165460050	3551	0	0	0	0	26	0	0	0	0	0	0.332835	0	0	0.110945	-1	0.00590174	0.39434	-
NONRATT017101.2	20:4517269-4517951	683	32	35	76	9	28	14	1.94848	2.42666	5.24641	0.581643	1.86359	0.943621	3.20718	1.12962	1.50547	0.00595588	0.395928	-
MSTRG.16090.1	4:140077328-140134632	609	20	17	18	7	5	10	1.36574	1.32189	1.39355	0.507368	0.373189	0.755915	1.36039	0.54549	1.3184	0.00596277	0.395928	-
NONRATT028016.2	8:115609227-115609649	423	22	20	12	10	2	7	2.16289	2.23897	1.33751	1.04345	0.21498	0.761867	1.91312	0.673431	1.50633	0.00600424	0.39633	-
NONRATT017688.2	20:14180229-14188106	648	3	1	2	19	2	12	0.192513	0.0730739	0.145528	1.2942	0.140334	0.852504	0.137038	0.762345	-2.47587	0.00600888	0.39633	-
MSTRG.7640.1	14:114783333-114786704	2746	19	13	79	197	60	175	0.287747	0.224188	1.35642	3.16663	0.993261	2.93384	0.622785	2.36458	-1.92478	0.00602478	0.39633	-
NONRATT027564.2	8:36711163-36712091	929	7	31	5	61	48	58	0.313369	1.5802	0.253748	2.8983	2.34873	2.87415	0.715771	2.70706	-1.91916	0.00614933	0.401231	-
NONRATT005459.2	10:43760238-43760850	492	0	0	0	25	0	0	0	0	0	2.24291	0	0	0	0.747637	-1	0.00615757	0.401231	-
NONRATT006861.2	11:31161141-31181453	542	15	13	14	4	2	9	1.15096	1.13583	1.21784	0.32574	0.16778	0.764465	1.16821	0.419328	1.47815	0.00615767	0.401231	-
NONRATT000050.2	1:15799748-15810401	492	6	21	17	0	8	2	0.507189	2.02121	1.62916	0	0.739134	0.187135	1.38585	0.308756	2.16623	0.00618199	0.401231	-
NONRATT021390.2	4:77307191-77346917	431	2	3	8	1	0	0	0.192959	0.329595	0.875195	0.10246	0	0	0.465917	0.0341532	3.76998	0.00621146	0.401231	-
MSTRG.8246.1	15:59581712-59651531	8229	1836	1246	788	403	602	545	9.27866	7.17023	4.51488	2.16167	3.32553	3.04893	6.98792	2.84537	1.29625	0.00621258	0.401231	-
MSTRG.14660.1	3:139951503-139964671	698	93	82	27	20	28	27	5.54097	5.56316	1.8238	1.26476	1.82355	1.78077	4.30931	1.62302	1.40877	0.0062445	0.40207	-
NONRATT005561.2	10:55559053-55560308	468	25	25	0	0	0	5	2.22156	2.52958	0	0	0	0.491879	1.58371	0.16396	3.2719	0.00628282	0.403315	-
NONRATT004133.2	10:16214514-16215221	708	35	12	12	4	2	11	2.05587	0.80264	0.799105	0.249366	0.128441	0.715269	1.21921	0.364359	1.74251	0.00635473	0.404372	-
NONRATT020266.2	4:44976871-44977875	1005	0	0	0	0	25	0	0	0	0	0	1.1308	0	0	0.376933	-1	0.00636428	0.404372	-
NONRATT029618.2	9:93545477-93549442	1041	22	0	0	0	0	0	0.878868	0	0	0	0	0	0.292956	0	1	0.00637022	0.404372	-
NONRATT022191.2	5:56566243-56566874	286	22	0	0	0	0	0	3.19895	0	0	0	0	0	1.06632	0	1	0.0063754	0.404372	-
NONRATT004573.2	10:62690123-62691951	1829	11	7	11	40	22	21	0.25011	0.181226	0.283564	0.965337	0.546786	0.528574	0.2383	0.680232	-1.51325	0.0063968	0.404522	-
MSTRG.450.4	1:54909812-54931500	787	1	0	47	1	1	1	0.0528371	0	2.81574	0.0561119	0.0577449	0.0585242	0.956191	0.0574603	4.05666	0.00650382	0.410069	-
NONRATT018807.2	3:153543013-153545776	573	42	46	20	20	11	12	3.0483	3.80162	1.64568	1.54066	0.872662	0.964088	2.83187	1.1258	1.3308	0.00652802	0.410377	-
NONRATT007580.2	12:43949225-43950053	829	19	10	3	4	1	2	0.95314	0.571249	0.170603	0.212969	0.0548193	0.111062	0.564997	0.126283	2.16158	0.00657724	0.412252	-
NONRATT018537.2	3:114355325-114639204	843	5	4	1	9	18	12	0.246683	0.224683	0.0559043	0.471248	0.970634	0.655305	0.175757	0.699063	-1.99184	0.00663289	0.414516	-
NONRATT018612.2	3:123674967-123679820	621	4	6	6	18	15	16	0.267844	0.457506	0.455567	1.27943	1.09801	1.18609	0.393639	1.18784	-1.5934	0.00666247	0.415144	-
NONRATT001524.2	1:225208019-225208627	609	11	7	216	7	19	9	0.75115	0.544274	16.7225	0.507368	1.41821	0.680362	6.00599	0.868646	2.78956	0.00668624	0.415407	-
NONRATT026641.2	7:29021700-29046561	1062	82	124	130	52	46	50	3.21106	5.52915	5.77144	2.16126	1.969	2.16743	4.83722	2.09923	1.20432	0.00675009	0.41745	-
NONRATT023133.2	5:50230942-50239621	550	0	0	7	11	16	8	0	0	0.600062	0.882796	1.32238	0.669603	0.200021	0.958259	-2.26027	0.00676724	0.41745	-
NONRATT016850.2	2:227718791-227719556	766	55	46	18	15	18	13	2.98602	2.84377	1.10793	0.864346	1.0682	0.781307	2.31257	0.904619	1.35412	0.00677806	0.41745	-
NONRATT008963.2	13:89652516-89654112	710	33	33	27	95	76	78	1.93295	2.20099	1.79297	5.90604	4.86592	5.05745	1.97564	5.27647	-1.41726	0.00683316	0.419627	-
NONRATT001930.2	1:2000375-2001227	761	1	1	2	2	10	12	0.0546423	0.0622232	0.123919	0.115999	0.597359	0.725917	0.0802615	0.479758	-2.57953	0.00692084	0.423787	-
NONRATT001495.2	1:224450464-224451041	578	0	0	0	5	3	1	0	0	0	0.381853	0.235955	0.079686	0	0.232498	-1	0.00697589	0.42593	-
NONRATT008312.2	13:69901246-69902916	1671	24	20	4	5	3	6	0.597311	0.566777	0.112869	0.132083	0.0816168	0.165297	0.425652	0.126332	1.75245	0.00702114	0.427465	-
NONRATT008375.2	13:78853132-78855841	1132	24	21	10	7	9	4	0.88172	0.878477	0.416487	0.272957	0.361436	0.162669	0.725561	0.265687	1.44937	0.00706483	0.428896	-
NONRATT014517.2	19:19898570-19913541	1806	57	63	20	0	22	0	1.31255	1.65191	0.522135	0	0.553749	0	1.1622	0.184583	2.65451	0.00710145	0.429383	-
ENSRNOT00000082897	20:56198049-56199332	494	34	33	23	10	16	13	2.8623	3.16337	2.19515	0.893478	1.47228	1.2115	2.74027	1.19242	1.20043	0.00711327	0.429383	-
NONRATT013730.2	18:27357777-27374587	833	0	4	7	0	0	0	0	0.22738	0.3962	0	0	0	0.20786	0	1	0.00720631	0.433767	-
NONRATT015319.2	2:150729332-150756141	802	109	97	55	47	27	3	5.65212	5.72745	3.23335	2.58677	1.53041	0.172231	4.87097	1.4298	1.76839	0.00730269	0.436906	-
NONRATT013950.2	18:74461064-74462107	1044	3	3	3	7	8	20	0.119491	0.136069	0.135469	0.295964	0.348327	0.881901	0.130343	0.508731	-1.96459	0.00730609	0.436906	-
NONRATT003922.2	1:274098120-274106462	584	4	6	3	12	13	19	0.284813	0.486492	0.242174	0.907017	1.01194	1.49776	0.337826	1.13891	-1.75329	0.0073295	0.436906	-
NONRATT000710.2	1:101688781-101690849	2069	68	39	142	330	184	229	1.36682	0.892613	3.2359	7.04018	4.04266	5.09535	1.83178	5.39273	-1.55777	0.00734905	0.436906	-
NONRATT003540.2	1:224773077-224822563	723	74	85	22	26	20	22	4.25649	5.56728	1.43469	1.58731	1.25751	1.40079	3.75282	1.41521	1.40696	0.00737984	0.436906	-
NONRATT026872.2	7:75413877-75419012	881	112	109	55	28	51	32	5.28689	5.85884	2.94341	1.40284	2.6315	1.67216	4.69638	1.90217	1.30391	0.00738184	0.436906	-
NONRATT030463.2	X:17171570-17175134	915	14	13	7	3	4	5	0.636327	0.67281	0.360693	0.144738	0.198718	0.251584	0.55661	0.198347	1.48864	0.00741745	0.437795	-
NONRATT000035.2	1:12959320-12961680	2361	4	6	0	0	0	0	0.0704494	0.120335	0	0	0	0	0.0635948	0	1	0.0074553	0.43881	-
NONRATT025014.2	6:75793223-75798319	1592	146	33	27	18	28	18	3.8139	0.981599	0.799629	0.499073	0.799519	0.520499	1.86504	0.606364	1.62095	0.0075225	0.441542	-
NONRATT021570.2	4:118122760-118127821	633	4	3	4	0	0	1	0.262766	0.224416	0.297954	0	0	0.0727623	0.261712	0.0242541	3.43168	0.00766935	0.448921	-
ENSRNOT00000076067	13:75158209-75167669	477	10	8	9	5	2	1	0.87184	0.794161	0.889594	0.462707	0.190643	0.0965587	0.851865	0.249969	1.76887	0.00771663	0.449227	-
NONRATT010697.2	15:107789379-107790070	692	4	3	6	11	44	5	0.240363	0.205283	0.408825	0.701645	2.89038	0.332658	0.284823	1.30823	-2.19947	0.00771686	0.449227	-
NONRATT012540.2	17:44744510-44744901	392	0	160	9	8	7	4	0	19.3284	1.08249	0.900771	0.811757	0.469747	6.80362	0.727425	3.22543	0.00775731	0.450348	-
NONRATT003204.2	1:198658745-198659418	570	3	6	10	18	17	22	0.218857	0.498441	0.827129	1.3939	1.35579	1.7768	0.514809	1.50883	-1.55132	0.00779761	0.451454	-
NONRATT026759.2	7:59766842-59783263	717	8	5	25	34	36	42	0.46402	0.330208	1.64394	2.09313	2.28241	2.69669	0.812724	2.35741	-1.53637	0.0079835	0.460019	-
NONRATT029545.2	9:82633266-82635371	383	4	2	4	10	11	11	0.434285	0.247268	0.49244	1.15242	1.30558	1.32222	0.391331	1.26007	-1.68705	0.00798939	0.460019	-
NONRATT021518.2	4:113559391-113565429	2912	14	31	12	4	9	7	0.199945	0.504121	0.194288	0.0606288	0.140503	0.11067	0.299451	0.103934	1.52666	0.0080105	0.460019	-
NONRATT007680.2	12:2537289-2538014	726	5	11	15	2	3	4	0.286438	0.717517	0.974164	0.121592	0.187854	0.253638	0.659373	0.187694	1.81271	0.00808795	0.461098	-
NONRATT008852.2	13:74280172-74282320	1965	1436	1228	162	183	165	0	30.3914	29.5936	3.88705	4.11074	3.81709	0	21.2907	2.64261	3.01019	0.00810738	0.461098	-
NONRATT006496.2	11:36497535-36510183	1728	20	14	11	4	8	5	0.481328	0.383665	0.300138	0.102171	0.210448	0.133217	0.388377	0.148612	1.38591	0.00811902	0.461098	-
NONRATT001041.2	1:166865955-166883688	513	0	0	0	3	3	2	0	0	0	0.258159	0.265851	0.179475	0	0.234495	-1	0.00812946	0.461098	-
NONRATT022912.2	5:172504122-172547058	1081	1	2	6	12	8	12	0.0384669	0.0876075	0.261708	0.490007	0.336405	0.511029	0.129261	0.445814	-1.78615	0.00813778	0.461098	-
ENSRNOT00000083054	14:86100050-86101181	834	5	4	3	77	8	2	0.249345	0.227107	0.16958	4.07526	0.436036	0.110396	0.215344	1.54056	-2.83874	0.00821515	0.463888	-
NONRATT012282.2	17:9817795-9818728	934	4	76	112	4	8	26	0.178085	3.85324	5.65374	0.189027	0.389351	1.28149	3.22836	0.619957	2.38056	0.00823069	0.463888	-
NONRATT019275.2	3:29993489-29996803	709	64	22	8	5	13	9	3.75399	1.46938	0.53203	0.311299	0.833529	0.584401	1.91847	0.57641	1.73479	0.00828359	0.465634	-
NONRATT022886.2	5:169289957-169292669	723	0	0	0	10	0	3	0	0	0	0.610481	0	0.19105	0	0.267177	-1	0.00834897	0.466704	-
NONRATT028339.2	8:22853700-22859779	407	19	5	3	1	2	2	1.94141	0.581718	0.347493	0.108501	0.223431	0.226217	0.956873	0.18605	2.36264	0.00835757	0.466704	-
NONRATT021694.2	4:144634795-144636302	1508	0	0	20	0	0	0	0	0	0.625315	0	0	0	0.208438	0	1	0.00838768	0.466704	-
NONRATT031078.2	X:74569338-74578471	1029	62	57	84	102	663	79	2.50575	2.62313	3.84884	4.37539	29.2893	3.53436	2.99257	12.3997	-2.05085	0.00839048	0.466704	-
NONRATT021556.2	4:116993298-116994278	981	42	41	41	36	171	212	1.78051	1.97912	1.97052	1.61983	7.9239	9.94868	1.91005	6.49747	-1.76627	0.00844294	0.468396	-
NONRATT026513.2	7:12400068-12403103	761	13	51	16	91	96	78	0.710402	3.17357	0.991289	5.27824	5.73454	4.71852	1.62509	5.24377	-1.69009	0.00850131	0.469253	-
NONRATT009047.2	13:98647381-98647745	365	2	2	3	11	5	11	0.227851	0.259462	0.387478	1.33024	0.622663	1.38743	0.291597	1.11344	-1.93298	0.00850256	0.469253	-
NONRATT028794.2	8:84122114-84320749	1670	120	89	308	235	1857	242	2.9883	2.52368	8.69563	6.21129	50.5483	6.67108	4.73587	21.1435	-2.15852	0.0085569	0.471028	-
MSTRG.15332.1	4:25186874-25259666	469	0	1	0	1	2	16	0	0.100963	0	0.0941579	0.193894	1.5705	0.0336545	0.619517	-4.20227	0.00862718	0.47367	-
NONRATT017226.2	20:8366422-8385170	581	7	3	0	0	0	0	0.501066	0.244502	0	0	0	0	0.248523	0	1	0.00872235	0.476875	-
NONRATT018183.2	3:47475091-47492026	503	21	18	16	7	10	6	1.73622	1.69459	1.49974	0.614288	0.903758	0.549128	1.64352	0.689058	1.25409	0.00873044	0.476875	-
ENSRNOT00000078751	2:156302569-156353036	4140	9	10	13	3	5	4	0.090407	0.114388	0.148053	0.0319893	0.0548966	0.0444785	0.117616	0.0437881	1.42547	0.00883145	0.481155	-
NONRATT009496.2	14:82376004-82405684	726	19	0	0	0	0	0	1.08836	0	0	0	0	0	0.362788	0	1	0.00886748	0.481452	-
NONRATT016958.2	2:257544764-257546904	335	4	2	7	8	20	15	0.496511	0.282698	0.985177	1.05404	2.71397	2.06135	0.588128	1.94312	-1.72417	0.0088822	0.481452	-
NONRATT012820.2	17:13555810-13559354	504	5	0	5	0	0	0	0.412607	0	0.467722	0	0	0	0.293443	0	1	0.00892728	0.482664	-
NONRATT016935.2	2:252341200-252353506	682	1	2	0	7	3	8	0.0609718	0.138862	0	0.45306	0.199973	0.540002	0.0666112	0.397679	-2.57777	0.00902982	0.486859	-
NONRATT016191.2	2:60314022-60314560	539	36	83	29	29	14	14	2.77763	7.29209	2.53676	2.37488	1.18074	1.19572	4.20216	1.58378	1.40776	0.0090507	0.486859	-
NONRATT030498.2	X:29473226-29487999	609	0	0	0	5	0	5	0	0	0	0.362416	0	0.377996	0	0.246804	-1	0.00910221	0.488393	-
NONRATT002408.2	1:82337954-82338397	444	9	16	7	3	5	3	0.842984	1.70648	0.74332	0.298279	0.511874	0.311101	1.09759	0.373751	1.55419	0.00917625	0.491126	-
NONRATT011783.2	16:10722235-10726611	620	5	1	1	22	11	3	0.33541	0.076374	0.0760118	1.56625	0.806509	0.222789	0.162598	0.865183	-2.41169	0.00926581	0.492215	-
NONRATT004866.2	10:87245262-87248711	661	0	0	0	2	2	4	0	0	0	0.133549	0.137574	0.278579	0	0.183234	-1	0.00929204	0.492215	-
NONRATT011666.2	16:81782491-81783052	562	4	3	3	61	4	4	0.295963	0.252768	0.251654	4.79096	0.323535	0.327653	0.266795	1.81405	-2.76541	0.00931139	0.492215	-
NONRATT024899.2	6:29139438-29145898	248	2	0	0	1	6	13	0.335345	0	0	0.178065	1.09985	2.41323	0.111782	1.23038	-3.46035	0.00931482	0.492215	-
NONRATT020718.2	4:123134867-123136668	816	27	40	21	7	17	12	1.37605	2.32128	1.21336	0.37866	0.947058	0.676988	1.6369	0.667569	1.29398	0.0093342	0.492215	-
MSTRG.14715.1	3:146333943-146347033	840	56	38	21	18	10	19	2.77247	2.14222	1.17869	0.945863	0.541179	1.0413	2.03113	0.842781	1.26905	0.00933559	0.492215	-
NONRATT018433.2	3:97892214-97895556	774	1	0	2	2	6	13	0.0537245	0	0.121838	0.114051	0.352408	0.773231	0.0585207	0.41323	-2.81993	0.0093664	0.492617	-
NONRATT005431.2	10:40056228-40092635	656	0	0	0	0	0	21	0	0	0	0	0	1.47372	0	0.491241	-1	0.00942417	0.494356	-
NONRATT028273.2	8:13854962-13861182	437	3	2	4	13	12	6	0.285465	0.216713	0.431589	1.31307	1.24824	0.632062	0.311256	1.06446	-1.77395	0.00944601	0.494356	-
NONRATT000286.2	1:61788570-61789370	801	23	16	8	6	2	8	1.19416	0.945913	0.470923	0.33062	0.113529	0.459777	0.870333	0.301309	1.53032	0.00949091	0.495486	-
NONRATT003894.2	1:267043735-267043996	262	0	0	0	0	20	0	0	0	0	0	3.47016	0	0	1.15672	-1	0.00952879	0.496245	-
NONRATT007677.2	12:2177278-2180001	849	0	0	1	4	1	8	0	0	0.0555092	0.207952	0.0535279	0.433783	0.0185031	0.231754	-3.64676	0.00961091	0.49882	-
NONRATT028583.2	8:58993770-59023387	462	15	20	21	8	4	11	1.35026	2.04997	2.14308	0.764291	0.393565	1.09613	1.84777	0.751327	1.29827	0.0096252	0.49882	-
NONRATT012710.2	17:1708050-1711500	3163	220	22	889	35	135	46	2.89256	0.329367	13.2516	0.488425	1.9402	0.669512	5.49119	1.03271	2.41068	0.00967609	0.499058	-
NONRATT031263.2	X:123528492-123535388	731	18	0	0	0	0	0	1.02404	0	0	0	0	0	0.341345	0	1	0.00967676	0.499058	-
NONRATT001051.2	1:167089888-167090679	792	9	4	20	45	26	27	0.472582	0.239151	1.19063	2.50797	1.4923	1.56941	0.634119	1.85656	-1.5498	0.00972476	0.500319	-
NONRATT016976.2	2:260319634-260320731	1098	2	0	10	0	0	0	0.0757427	0	0.429384	0	0	0	0.168376	0	1	0.00981889	0.503942	-
MSTRG.2087.22	1:215932772-215937806	1197	433	519	871	48	331	11	15.0437	20.5322	34.3076	1.77001	12.5703	0.423067	23.2945	4.92111	2.24293	0.0098634	0.505006	-
NONRATT007516.2	12:38879898-38880485	588	1	3	1	6	10	6	0.070719	0.241591	0.0801485	0.450386	0.773113	0.469747	0.13082	0.564415	-2.10918	0.00991277	0.505241	-
NONRATT021163.2	4:18173129-18173942	814	20	23	8	8	6	5	1.02179	1.33801	0.463402	0.433787	0.33509	0.2828	0.941067	0.350559	1.42464	0.00991554	0.505241	-
NONRATT002073.2	1:37811144-37863769	346	0	0	0	4	0	6	0	0	0	0.510264	0	0.798298	0	0.436187	-1	0.00999972	0.50798	-
NONRATT010429.2	15:34156886-34164603	531	25	22	31	15	8	13	1.95798	1.96194	2.75257	1.24687	0.684847	1.12708	2.22416	1.0196	1.12526	0.0100171	0.50798	-
NONRATT027296.2	7:138706252-138707078	445	0	0	5	12	3	14	0	0	0.529735	1.19033	0.306476	1.4483	0.176578	0.981702	-2.47498	0.0101067	0.511302	-
NONRATT010060.2	14:82337303-82339769	1431	0	3	0	2	9	10	0	0.0992702	0	0.061688	0.285916	0.3217	0.0330901	0.223101	-2.75323	0.0103922	0.524499	-
NONRATT031147.2	X:105804606-105805816	1211	46	32	17	110	57	111	1.57969	1.25132	0.661887	4.0094	2.13965	4.21964	1.1643	3.45623	-1.56973	0.0106018	0.533807	-
NONRATT002898.2	X:157236343-157238730	2388	5	10	16	31	20	34	0.0870829	0.19831	0.315901	0.573006	0.380729	0.655462	0.200431	0.536399	-1.4202	0.0106658	0.534926	-
NONRATT023402.2	5:116996652-117038369	1290	0	0	0	0	0	20	0	0	0	0	0	0.713724	0	0.237908	-1	0.0107074	0.534926	-
NONRATT009672.2	14:2041829-2044534	1911	106	159	63	59	50	26	2.30678	3.94001	1.55435	1.36276	1.18938	0.626329	2.60038	1.05949	1.29535	0.0107237	0.534926	-
NONRATT015398.2	2:187283489-187284670	1182	262	319	122	1146	1041	252	9.21815	12.7801	4.86642	42.7955	40.0354	9.81477	8.95489	30.8819	-1.78601	0.0107247	0.534926	-
NONRATT009556.2	14:78961270-78964106	525	18	7	11	4	4	5	1.42585	0.631358	0.987883	0.336288	0.346337	0.438475	1.01503	0.3737	1.44157	0.0109333	0.542918	-
NONRATT007595.2	12:45905237-45912668	529	1	0	4	7	6	9	0.0786063	0	0.35653	0.584096	0.515621	0.783252	0.145046	0.627656	-2.11347	0.0109569	0.542918	-
NONRATT010594.2	15:57391932-57392217	286	67	30	8	14	9	12	9.7424	4.96731	1.31891	2.16075	1.43058	1.93155	5.34287	1.84096	1.53716	0.0109616	0.542918	-
NONRATT026406.2	7:3340299-3341920	507	23	24	19	8	4	15	1.88664	2.2416	1.76686	0.696454	0.358633	1.36203	1.96503	0.805707	1.28623	0.0110417	0.545343	-
NONRATT027796.2	8:70460042-70463243	743	15	7	15	6	4	4	0.839599	0.446115	0.951875	0.356429	0.24472	0.247834	0.745863	0.282994	1.39814	0.0110619	0.545343	-
NONRATT015702.2	2:211359659-211369714	658	32	33	37	15	19	15	2.02251	2.37493	2.65118	1.00621	1.3126	1.04947	2.34954	1.12276	1.06533	0.0111075	0.546323	-
NONRATT028078.2	8:118262691-118278801	711	44	33	23	13	7	22	2.57362	2.1979	1.52518	0.807051	0.447551	1.42444	2.0989	0.893013	1.23288	0.0111629	0.547331	-
NONRATT019414.2	3:66801111-66803169	2059	486	67	85	672	780	968	9.81612	1.54092	1.9464	14.406	17.2206	21.643	4.43448	17.7565	-2.00151	0.0111799	0.547331	-
NONRATT011968.2	16:41222355-41234142	958	60	0	19	275	110	72	2.60464	0	0.935073	12.6706	5.21963	3.4599	1.17991	7.11671	-2.59254	0.0112053	0.547331	-
NONRATT008009.2	12:40809836-40810471	636	4	11	5	20	15	24	0.261527	0.819052	0.370648	1.38805	1.07211	1.73718	0.483742	1.39911	-1.5322	0.0113042	0.550572	-
MSTRG.7636.1	14:114749977-114783188	6952	75	75	235	403	212	534	0.448652	0.510871	1.59377	2.55874	1.38623	3.53614	0.851097	2.4937	-1.55089	0.0113304	0.550572	-
NONRATT020014.2	3:168098510-168100149	441	16	22	70	13	14	13	1.50885	2.36233	7.48388	1.30116	1.44312	1.3571	3.78502	1.36713	1.46915	0.0113532	0.550572	-
NONRATT023855.2	5:165736228-165737038	477	1	1	0	6	4	3	0.0871756	0.0992702	0	0.555192	0.381189	0.289578	0.0621486	0.408653	-2.71708	0.0114221	0.550572	-
NONRATT028099.2	8:119524039-119524511	473	0	0	0	19	0	0	0	0	0	1.77302	0	0	0	0.591008	-1	0.0114263	0.550572	-
NONRATT018070.2	3:15198343-15199549	718	4	3	1	0	0	0	0.231659	0.197849	0.0656369	0	0	0	0.165048	0	1	0.0114271	0.550572	-
NONRATT028730.2	8:78909112-78949169	2620	8	6	59	3	7	8	0.126986	0.108439	1.06174	0.050548	0.121454	0.140566	0.432387	0.104189	2.05312	0.0114654	0.551171	-
NONRATT018874.2	3:161039971-161045320	752	4	8	8	17	20	18	0.221185	0.503743	0.501608	0.997826	1.20902	1.10191	0.408845	1.10292	-1.4317	0.011598	0.556153	-
NONRATT023125.2	5:48501892-48547303	829	30	1	2	1	2	1	1.50495	0.0571193	0.113754	0.0532691	0.109694	0.0555591	0.558608	0.0728408	2.93902	0.0116214	0.556153	-
NONRATT006697.2	11:81372238-81373037	611	12	14	17	2	6	9	0.816748	1.08506	1.31186	0.144477	0.446421	0.678135	1.07122	0.423011	1.34049	0.0116969	0.558505	-
NONRATT004460.2	10:56524440-56525803	678	74	40	31	15	32	9	4.53901	2.79376	2.15577	0.976533	2.14552	0.611121	3.16285	1.24439	1.34578	0.0117515	0.559143	-
NONRATT029310.2	9:42840387-42850183	767	1	1	1	4	6	5	0.0542148	0.0617365	0.0614437	0.230184	0.355624	0.30013	0.0591317	0.295312	-2.32024	0.0117772	0.559143	-
NONRATT003529.2	1:222482922-222483634	713	0	0	17	0	0	0	0	0	1.12419	0	0	0	0.374729	0	1	0.0117892	0.559143	-
NONRATT025575.2	7:12432890-12434863	296	9	7	5	2	2	2	1.26448	1.11981	0.796392	0.298228	0.307218	0.311049	1.06023	0.305498	1.79513	0.0118565	0.561083	-
NONRATT009320.2	14:36750784-36755360	3702	13	13	37	34	100	52	0.146034	0.166294	0.471225	0.405395	1.22793	0.646644	0.261184	0.759991	-1.54092	0.011928	0.562355	-
NONRATT024928.2	6:41827611-41839107	756	0	0	0	0	18	0	0	0	0	0	1.08233	0	0	0.360778	-1	0.0119363	0.562355	-
NONRATT025123.2	6:99658203-99659425	1223	4	52	21	4	13	3	0.136002	2.01344	0.809569	0.144359	0.483215	0.112943	0.986337	0.246839	1.99851	0.0121969	0.573363	-
MSTRG.19810.3	7:69123916-69132270	8328	42	0	92	554	21	536	0.209735	0	0.520853	2.9363	0.114628	2.96294	0.24353	2.00462	-3.04116	0.0122936	0.576634	-
NONRATT018825.2	3:152460446-152464394	3949	153	194	677	241	218	6409	1.61125	2.32636	8.08292	2.69378	2.50946	74.7138	4.00684	26.639	-2.733	0.0124356	0.582006	-
NONRATT015791.2	2:240626553-240654450	753	9	12	4	14	107	7	0.497058	0.754674	0.250471	0.820682	6.45952	0.427981	0.500734	2.5694	-2.35931	0.01248	0.582232	-
NONRATT004935.2	10:90349253-90350144	393	13	21	6	2	8	1	1.37561	2.53037	0.719865	0.22462	0.925328	0.117197	1.54195	0.422382	1.86814	0.0124952	0.582232	-
NONRATT018065.2	3:14363268-14364690	460	2	1	5	0	0	0	0.180795	0.102939	0.512461	0	0	0	0.265398	0	1	0.0125919	0.585455	-
NONRATT029516.2	9:81954429-81954965	537	14	22	20	11	2	9	1.08424	1.94001	1.75601	0.904168	0.169342	0.771583	1.59342	0.615031	1.3734	0.0126328	0.586073	-
NONRATT016292.2	2:115888132-115888526	395	11	8	22	30	33	42	1.1581	0.959025	2.62602	3.35235	3.79774	4.895	1.58105	4.01503	-1.34453	0.012747	0.590084	-
NONRATT019330.2	X:112117197-112118254	396	27	10	15	5	3	11	2.83549	1.19587	1.78597	0.557352	0.344398	1.27881	1.93911	0.726855	1.41566	0.0127819	0.590413	-
NONRATT017209.2	20:7746232-7747363	1132	14	16	11	4	8	5	0.514345	0.669326	0.458161	0.155964	0.321249	0.203356	0.547278	0.226856	1.27049	0.012952	0.596435	-
NONRATT010750.2	15:10434097-10451009	545	35	32	16	7	17	10	2.67075	2.78046	1.38417	0.566948	1.41798	0.844683	2.27846	0.943204	1.27242	0.0129684	0.596435	-
NONRATT026324.2	7:143059751-143069309	1008	45	82	19	89	247	147	1.85657	3.85227	0.888691	3.89729	11.139	6.71358	2.19918	7.24997	-1.72101	0.0130101	0.597059	-
NONRATT012351.2	17:16381093-16381886	794	58	10	58	4	13	22	3.03784	0.59643	3.44411	0.222357	0.744297	1.27553	2.35946	0.747396	1.65851	0.013063	0.598194	-
NONRATT011136.2	15:81576670-81577267	598	0	0	0	18	0	0	0	0	0	1.32864	0	0	0	0.442879	-1	0.0131998	0.603132	-
NONRATT017257.2	20:10992584-10993392	809	33	49	45	27	9	21	1.69641	2.86821	2.6226	1.47316	0.505742	1.19501	2.39574	1.05797	1.17917	0.0132781	0.603132	-
NONRATT015771.2	2:236232549-236232967	419	0	0	0	5	1	2	0	0	0	0.526757	0.108461	0.219738	0	0.284986	-1	0.0132819	0.603132	-
NONRATT021671.2	4:131415443-131464514	727	1	4	4	0	32	20	0.0571977	0.260533	0.259429	0	2.00091	1.26644	0.192386	1.08912	-2.50108	0.013301	0.603132	-
NONRATT005287.2	10:15160036-15165830	478	0	4	5	0	0	0	0	0.39625	0.493163	0	0	0	0.296471	0	1	0.0133127	0.603132	-
NONRATT000852.2	1:142079566-142080883	451	11	9	13	6	5	2	1.0143	0.945041	1.35907	0.587199	0.503929	0.204147	1.10614	0.431759	1.35724	0.013379	0.604847	-
NONRATT011067.2	15:52308511-52319189	318	11	11	13	35	34	20	1.43852	1.6381	1.92749	4.85814	4.86023	2.8953	1.66804	4.20456	-1.3338	0.0135557	0.608761	-
NONRATT006129.2	10:91679058-91679665	608	7	11	13	4	3	5	0.478815	0.856772	1.00813	0.29038	0.224312	0.378617	0.781238	0.29777	1.39156	0.0135602	0.608761	-
NONRATT010042.2	14:81660518-81679382	770	34	18	25	10	13	12	1.83633	1.10699	1.53079	0.573218	0.767496	0.717432	1.49137	0.686049	1.12025	0.0135878	0.608761	-
NONRATT015025.2	2:44836495-44837226	732	12	7	7	5	1	3	0.68174	0.452818	0.450866	0.301518	0.0620836	0.188701	0.528475	0.184101	1.52134	0.0136003	0.608761	-
NONRATT009963.2	14:70268579-70269034	456	208	171	78	62	80	59	18.9696	17.758	8.0648	6.00148	7.97507	5.95646	14.9308	6.64434	1.16809	0.0136089	0.608761	-
NONRATT003411.2	1:219385273-219385978	706	1	0	1	2	8	4	0.0588991	0	0.0667525	0.125036	0.51509	0.260823	0.0418839	0.300316	-2.84202	0.0136685	0.610142	-
NONRATT018771.2	3:149161825-149168959	418	2	0	0	4	6	3	0.198961	0	0	0.422371	0.652544	0.330452	0.0663202	0.468456	-2.82039	0.0138671	0.617106	-
NONRATT022282.2	5:71800544-71822153	1273	9	13	11	23	21	46	0.294018	0.483599	0.407415	0.797515	0.749903	1.66352	0.39501	1.07031	-1.43807	0.0138826	0.617106	-
NONRATT019496.2	3:83310876-83318476	2407	310	289	355	192	164	74	5.35605	5.6857	6.95375	3.52092	3.09727	1.41531	5.9985	2.67783	1.16354	0.0139626	0.619369	-
NONRATT031177.2	X:113583123-113583744	622	0	0	0	10	0	2	0	0	0	0.709611	0	0.148023	0	0.285878	-1	0.014048	0.6204	-
NONRATT027551.2	8:33389737-33392240	2504	21	24	69	37	88	293	0.348769	0.45387	1.29921	0.652223	1.59758	5.38681	0.700616	2.54554	-1.86127	0.0141556	0.6204	-
NONRATT019897.2	3:156557263-156618004	468	15	0	0	0	0	0	1.33295	0	0	0	0	0	0.444318	0	1	0.0141806	0.6204	-
MSTRG.8858.2	16:56827046-56827398	327	15	0	0	0	0	0	1.90771	0	0	0	0	0	0.635904	0	1	0.0141872	0.6204	-
NONRATT020509.2	4:88441072-88513238	919	15	0	0	0	0	0	0.678805	0	0	0	0	0	0.226268	0	1	0.0141941	0.6204	-
NONRATT024964.2	6:43844932-43845521	590	38	45	97	81	440	96	2.67848	3.61182	7.75152	6.05986	33.9009	7.49063	4.68061	15.8171	-1.75672	0.0142067	0.6204	-
ENSRNOT00000089910	13:74762894-74766473	864	6	6	4	1	2	1	0.288816	0.328832	0.218292	0.0511112	0.105251	0.0533085	0.278647	0.0698901	1.99528	0.0142158	0.6204	-
NONRATT031164.2	X:107395602-107404754	718	565	355	293	187	199	185	32.7253	23.4134	19.2402	11.496	12.5991	11.8617	25.1263	11.9856	1.0679	0.0142194	0.6204	-
NONRATT003146.2	1:197295713-197416479	472	3	2	3	13	7	7	0.264297	0.200644	0.299639	1.21571	0.674171	0.682775	0.25486	0.857551	-1.75052	0.014311	0.623115	-
NONRATT009893.2	14:44028030-44030913	2884	50	36	77	448	58	85	0.721005	0.59111	1.25882	6.85668	0.914202	1.35682	0.856977	3.04257	-1.82796	0.0144695	0.628058	-
NONRATT011314.2	16:10636951-10637570	620	1	1	7	0	0	0	0.067069	0.076374	0.532313	0	0	0	0.225252	0	1	0.0144928	0.628058	-
NONRATT015960.2	2:20076347-20114079	461	11	14	14	7	7	1	0.992301	1.43812	1.43182	0.670253	0.690257	0.09991	1.28741	0.486807	1.40305	0.0145132	0.628058	-
NONRATT017283.2	20:12364382-12364893	512	122	172	83	47	66	61	9.90941	15.9082	7.64322	4.05193	5.85979	5.4848	11.1536	5.13217	1.11987	0.0145764	0.629509	-
NONRATT030662.2	X:106713320-106714290	971	83	42	20	20	18	21	3.55482	2.04827	0.971138	0.909166	0.842682	0.995636	2.19141	0.915828	1.25871	0.0146361	0.630662	-
NONRATT012347.2	17:16270638-16274626	2417	16	24	37	14	13	7	0.275302	0.470208	0.721751	0.255678	0.244506	0.133335	0.489087	0.211173	1.21167	0.0146763	0.630662	-
NONRATT004231.2	10:36716814-36726735	658	29	29	38	16	18	13	1.83286	2.08708	2.72287	1.07333	1.24353	0.909546	2.21427	1.07547	1.04187	0.0147092	0.630662	-
NONRATT018453.2	3:105470971-105474339	384	3	2	4	9	8	11	0.324865	0.246624	0.491158	1.03454	0.947015	1.31878	0.354216	1.10011	-1.63495	0.0147301	0.630662	-
NONRATT027380.2	7:145147278-145149116	641	18	33	46	111	62	79	1.16782	2.43792	3.38348	7.64359	4.39686	5.67372	2.32974	5.90472	-1.3417	0.0147515	0.630662	-
NONRATT007250.2	12:8102901-8106380	2134	27	44	4	7	11	6	0.526174	0.976393	0.0883808	0.144792	0.234318	0.129434	0.530316	0.169515	1.64544	0.0148791	0.633616	-
NONRATT009531.2	14:84892097-84901776	645	3	3	1	7	8	12	0.193408	0.220241	0.0730656	0.479049	0.563804	0.856469	0.162238	0.633108	-1.96434	0.0148802	0.633616	-
MSTRG.2582.1	1:251183775-251189557	3204	14	50	373	43	23	39	0.181723	0.738993	5.48887	0.592396	0.326316	0.560361	2.13653	0.493024	2.11554	0.0149831	0.636119	-
MSTRG.13228.1	20:20626632-20630707	1372	98	73	139	48	49	51	2.97052	2.51959	4.77668	1.54424	1.62351	1.71124	3.42226	1.62633	1.07333	0.015039	0.636119	-
MSTRG.17916.1	5:163118447-163121423	812	82	106	28	26	36	27	4.19969	6.18175	1.62578	1.41333	2.01538	1.53076	4.00241	1.65316	1.27564	0.0150401	0.636119	-
NONRATT007465.2	12:37018802-37020808	418	0	0	0	6	3	0	0	0	0	0.633557	0.326272	0	0	0.319943	-1	0.0150587	0.636119	-
NONRATT027061.2	7:117599626-117599997	372	13	14	12	4	7	6	1.45327	1.78219	1.52088	0.4746	0.8554	0.742503	1.58544	0.690834	1.19847	0.0152239	0.641819	-
NONRATT024067.2	6:26074587-26082997	290	12	17	13	6	8	4	1.7208	2.77596	2.11359	0.913196	1.25398	0.634968	2.20345	0.934048	1.2382	0.0153775	0.64701	-
NONRATT030326.2	9:103156722-103157130	409	1	1	2	6	8	4	0.101669	0.115775	0.230568	0.647498	0.889129	0.450222	0.149337	0.662283	-2.14887	0.0154791	0.649999	-
NONRATT001847.2	1:267507056-267508803	604	10	6	30	40	44	42	0.688523	0.470383	2.34179	2.92318	3.31149	3.2012	1.1669	3.14529	-1.43052	0.0156471	0.654582	-
NONRATT020490.2	4:85009650-85083777	650	46	46	47	30	15	23	2.94309	3.35127	3.40921	2.0372	1.04902	1.62897	3.23452	1.57173	1.0412	0.0156657	0.654582	-
NONRATT010673.2	15:103160929-103174721	4572	20	14	214	11	28	21	0.181919	0.145007	2.20686	0.106198	0.278398	0.211453	0.844596	0.198683	2.08779	0.0157429	0.654582	-
NONRATT008253.2	13:52667340-52680873	1785	0	0	0	2	2	3	0	0	0	0.0494541	0.0509448	0.0773832	0	0.0592607	-1	0.0157731	0.654582	-
NONRATT026020.2	7:115825738-115827232	686	0	0	0	2	2	3	0	0	0	0.128682	0.132561	0.201354	0	0.154199	-1	0.0157731	0.654582	-
NONRATT026192.2	7:126484987-126487072	403	0	0	0	3	2	2	0	0	0	0.328624	0.225649	0.228463	0	0.260912	-1	0.0157731	0.654582	-
NONRATT022029.2	5:5466544-5617326	1002	18	0	1	0	1	0	0.747076	0	0.0470332	0	0.0453545	0	0.264703	0.0151182	4.13002	0.0158931	0.655422	-
ENSRNOT00000084323	7:103621708-103670386	1017	3	6	3	2	0	0	0.122663	0.279362	0.139065	0.0868	0	0	0.180364	0.0289333	2.6401	0.0159348	0.655422	-
NONRATT005639.2	10:57644194-57644893	700	433	29	55	33	74	27	25.7247	1.96185	3.70449	2.08088	4.80559	1.77568	10.4637	2.88738	1.85756	0.0159526	0.655422	-
NONRATT023470.2	5:129090228-129121351	2899	20	57	22	54	45	286	0.286904	0.931079	0.357805	0.822206	0.705634	4.54167	0.525263	2.02317	-1.94551	0.0159677	0.655422	-
NONRATT026418.2	7:10339962-10341642	1681	207	95	144	80	62	69	5.12109	2.67618	4.0389	2.10066	1.67661	1.88965	3.94539	1.88897	1.06257	0.0159695	0.655422	-
NONRATT026700.2	7:36880045-36883460	853	16	20	8	37	36	40	0.780076	1.1103	0.442215	1.91461	1.91851	2.1588	0.777529	1.99731	-1.36109	0.0159784	0.655422	-
MSTRG.6357.1	13:71544877-71562819	8682	925	694	1594	3182	2302	2439	4.43079	3.78531	8.65636	16.1775	12.053	12.9327	5.62415	13.7211	-1.28669	0.016012	0.655537	-
NONRATT003316.2	1:212317491-212318079	589	15	5	4	1	3	2	1.05912	0.401968	0.320212	0.0749747	0.231548	0.156317	0.593767	0.15428	1.94435	0.016044	0.655583	-
NONRATT000172.2	1:47129770-47130620	851	11	107	139	38	29	13	0.537545	5.95409	7.70106	1.97101	1.54909	0.703268	4.7309	1.40779	1.74868	0.0161079	0.656477	-
NONRATT004284.2	10:40574556-40576326	1771	90	27	49	21	21	30	2.11341	0.721962	1.30451	0.523386	0.539032	0.779844	1.37996	0.614087	1.16811	0.0161277	0.656477	-
NONRATT003293.2	1:208001786-208002130	345	0	1	58	1	2	3	0	0.137252	7.92644	0.128	0.263584	0.400374	2.6879	0.263986	3.34795	0.0162326	0.65735	-
NONRATT009960.2	14:69896526-69899441	2916	59	31	147	20	36	35	0.841449	0.50343	2.37682	0.302744	0.56121	0.552557	1.24057	0.47217	1.39362	0.0162567	0.65735	-
NONRATT006969.2	11:57386937-57387664	728	4	2	2	7	10	9	0.228477	0.130088	0.129536	0.424432	0.624437	0.569149	0.1627	0.539339	-1.72898	0.016258	0.65735	-
NONRATT028049.2	8:117589569-117590867	521	50	3	0	4	0	2	3.99113	0.27266	0	0.33887	0	0.176719	1.42126	0.171863	3.04784	0.0162733	0.65735	-
NONRATT019500.2	3:88840984-88841537	554	0	17	15	3	1	2	0	1.45312	1.27661	0.239054	0.0820311	0.166192	0.909911	0.162426	2.48595	0.0163302	0.65735	-
NONRATT000005.2	1:1720387-1720772	386	22	17	23	6	15	6	2.37021	2.08557	2.80934	0.68608	1.76648	0.715573	2.42171	1.05605	1.19735	0.0163347	0.65735	-
NONRATT010343.2	15:24544019-24552726	597	16	21	12	4	11	5	1.11458	1.66572	0.947682	0.295731	0.83758	0.385594	1.24266	0.506302	1.29536	0.0164078	0.658317	-
NONRATT003337.2	1:213750212-213750835	382	23	5	1	3	1	1	2.50399	0.619789	0.12337	0.34669	0.118967	0.120572	1.08238	0.19541	2.46964	0.0164287	0.658317	-
NONRATT013083.2	17:69639277-69642741	1137	6	6	1	1	0	1	0.219469	0.249878	0.0414488	0.0388391	0	0.0405088	0.170265	0.0264493	2.68648	0.0164635	0.658317	-
NONRATT020530.2	4:97635411-97760118	801	1005	1109	831	565	355	515	52.1787	65.5633	48.9142	31.1349	20.1468	29.5987	55.5521	26.9601	1.04301	0.0164827	0.658317	-
NONRATT024046.2	6:22302121-22316897	488	0	0	7	8	9	13	0	0	0.6763	0.72357	0.838412	1.2264	0.225433	0.929459	-2.04369	0.0165582	0.660093	-
NONRATT027218.2	7:130068489-130069222	734	4	3	4	12	10	11	0.226609	0.193536	0.256954	0.72166	0.619333	0.689933	0.2257	0.676975	-1.5847	0.0166608	0.662937	-
NONRATT018223.2	3:56057035-56059377	1208	1	6	4	0	1	0	0.0344228	0.235191	0.15613	0	0.0376202	0	0.141915	0.0125401	3.50041	0.0167454	0.665058	-
NONRATT008674.2	13:47136053-47152970	1765	41	15	47	21	12	11	0.966059	0.40245	1.25552	0.525165	0.309054	0.286918	0.874675	0.373712	1.22682	0.0167833	0.665319	-
NONRATT030349.2	9:111558673-111559440	768	0	1	1	2	4	7	0	0.0616561	0.0613637	0.114942	0.236754	0.419622	0.0410066	0.257106	-2.64844	0.0168213	0.665583	-
NONRATT003012.2	1:167686151-167687958	1808	61	41	43	73	264	83	1.40311	1.07385	1.12134	1.7822	6.63769	2.11338	1.19943	3.51109	-1.54957	0.0169257	0.668112	-
MSTRG.88.2	1:11971451-11971922	322	132	79	95	174	210	408	17.0482	11.6181	13.9102	23.852	29.6466	58.3313	14.1922	37.2766	-1.39317	0.0169481	0.668112	-
NONRATT017794.2	20:43099234-43107892	698	0	0	0	0	8	2	0	0	0	0	0.520994	0.131906	0	0.217633	-1	0.0170119	0.669387	-
NONRATT006101.2	10:90644991-90645567	577	5	7	2	1	2	124	0.360406	0.574459	0.163436	0.0765339	0.157602	9.89334	0.3661	3.37583	-3.20493	0.0170682	0.670361	-
NONRATT003389.2	1:217745075-217746016	942	254	8	16	18	26	16	11.2135	0.402139	0.800818	0.843445	1.25467	0.781914	4.13883	0.960009	2.1081	0.017166	0.672316	-
NONRATT020663.2	4:118243423-118249255	390	0	0	0	16	0	0	0	0	0	1.8109	0	0	0	0.603632	-1	0.0171813	0.672316	-
NONRATT018164.2	3:45962045-45963977	612	1	1	0	4	5	3	0.0679457	0.0773723	0	0.288482	0.37136	0.225701	0.0484393	0.295181	-2.60735	0.0172296	0.67252	-
NONRATT026398.2	7:3098222-3099235	417	2	4	34	3	2	3	0.199438	0.454215	3.84423	0.317592	0.218073	0.331244	1.49929	0.28897	2.37529	0.0172498	0.67252	-
NONRATT027708.2	8:59499805-59503633	3184	39	542	44	18	96	6	0.509387	8.06098	0.651541	0.249537	1.3706	0.0867498	3.07397	0.568962	2.4337	0.0172871	0.67274	-
NONRATT007885.2	12:24720901-24722903	674	0	0	0	0	0	15	0	0	0	0	0	1.02456	0	0.341519	-1	0.0174403	0.677461	-
NONRATT007510.2	12:38870230-38870898	669	0	0	0	0	15	0	0	0	0	0	1.01923	0	0	0.339742	-1	0.0175345	0.679879	-
NONRATT024188.2	6:49529933-49536676	3570	595	104	63	86	87	75	6.9312	1.37952	0.832032	1.06331	1.1078	0.967146	3.04758	1.04609	1.54266	0.0176637	0.683638	-
NONRATT006811.2	11:14658225-14660926	2702	83	48	131	1025	71	87	1.27747	0.84124	2.28588	16.7444	1.1945	1.48228	1.4682	6.47373	-2.14055	0.017706	0.684031	-
NONRATT018218.2	3:55923336-55924823	1488	1	2	1	7	11	2	0.0279454	0.063645	0.0316716	0.207652	0.336045	0.0618753	0.0410873	0.201858	-2.29657	0.0178004	0.686432	-
NONRATT031085.2	X:75437271-75439574	2304	24	134	187	25	34	62	0.433206	2.75413	3.82672	0.478955	0.670812	1.23881	2.33802	0.796194	1.5541	0.0178472	0.686626	-
NONRATT012867.2	17:21131211-21131703	493	1	7	3	9	16	12	0.0843464	0.672339	0.286875	0.805806	1.47527	1.12053	0.347854	1.13387	-1.7047	0.017891	0.686626	-
MSTRG.292.1	1:41018803-41046296	268	0	7	5	12	12	16	0	1.2368	0.879597	1.97649	2.03538	2.74837	0.705466	2.25341	-1.67546	0.0179024	0.686626	-
NONRATT011384.2	16:19973655-19974587	724	16	19	10	36	51	28	0.919067	1.24272	0.651193	2.19482	3.20214	1.78037	0.937661	2.39244	-1.35135	0.0179651	0.687789	-
ENSRNOT00000089190	17:28008223-28008868	537	20	19	10	11	5	4	1.54886	1.67548	0.877959	0.904168	0.423226	0.342907	1.36743	0.556767	1.29632	0.0180033	0.688009	-
NONRATT024167.2	6:43004476-43109314	1721	1	1	1	33	1	0	0.024162	0.0275142	0.0273837	0.846377	0.0264063	0	0.0263533	0.290928	-3.46461	0.0183149	0.697446	-
NONRATT024165.2	6:42912329-42913568	450	5	2	9	10	16	20	0.46212	0.210453	0.94297	0.98084	1.61624	2.04601	0.538514	1.5477	-1.52307	0.0183387	0.697446	-
NONRATT009210.2	14:8438410-8438832	423	9	9	8	32	12	25	0.884835	1.0076	0.891747	3.33913	1.28955	2.72081	0.92806	2.44983	-1.40039	0.0183487	0.697446	-
NONRATT002161.2	1:52572137-52572841	705	14	13	6	1	7	3	0.825871	0.873221	0.401286	0.0626384	0.45136	0.195928	0.700126	0.236642	1.56491	0.0185978	0.705152	-
NONRATT005326.2	10:16694904-16697350	2447	48	87	69	132	173	194	0.815764	1.68363	1.32947	2.38106	3.21383	3.64976	1.27629	3.08155	-1.2717	0.018669	0.705152	-
NONRATT026105.2	7:120372500-120375151	2652	84	97	13	33	21	18	1.31724	1.73206	0.231124	0.549251	0.359965	0.312456	1.09347	0.407224	1.42502	0.0186719	0.705152	-
NONRATT028120.2	8:122773640-122777462	658	1	12	12	139	19	2	0.0631957	0.863631	0.859827	9.32438	1.3126	0.139925	0.595551	3.5923	-2.59261	0.0186851	0.705152	-
NONRATT009113.2	13:108282203-108285969	708	1	0	1	1	8	5	0.0587327	0	0.066564	0.062373	0.513635	0.32514	0.0417656	0.300383	-2.84642	0.0187173	0.705152	-
NONRATT008115.2	12:52563676-52564351	676	7	12	11	3	3	6	0.43065	0.840635	0.767217	0.195911	0.201748	0.408597	0.679501	0.268752	1.3382	0.0188867	0.710273	-
NONRATT027050.2	7:117299153-117299520	368	2	3	2	4	37	1	0.225993	0.386021	0.256256	0.479759	4.57047	0.125159	0.289423	1.72513	-2.57545	0.0190005	0.713291	-
NONRATT000776.2	1:126586552-126588395	268	46	32	29	20	22	7	7.13809	5.6543	5.10191	3.29403	3.73161	1.2025	5.96477	2.74271	1.12086	0.0191357	0.717081	-
NONRATT023599.2	5:144250416-144252477	1230	11	1	1	16	15	16	0.371911	0.0384975	0.0383149	0.574186	0.55436	0.598832	0.149574	0.575793	-1.94469	0.0191709	0.717081	-
NONRATT018982.2	3:176824127-176825354	420	6	6	7	3	1	2	0.594135	0.676455	0.785796	0.315323	0.108203	0.219215	0.685462	0.214247	1.6778	0.0192027	0.717081	-
NONRATT000606.2	1:91655772-91657044	1273	11	12	8	7	5	169	0.359348	0.446402	0.296315	0.242723	0.178533	6.1116	0.367355	2.17762	-2.5675	0.0192506	0.717607	-
NONRATT030878.2	X:14888401-14889626	1226	0	0	14	0	0	0	0	0	0.538392	0	0	0	0.179464	0	1	0.019397	0.721095	-
NONRATT001272.2	1:201950180-201965457	610	0	1	2	2	9	5	0	0.077626	0.154594	0.144714	0.67073	0.377376	0.0774066	0.397607	-2.36081	0.0194202	0.721095	-
NONRATT001222.2	1:198842333-198843033	701	0	1	1	11	4	1	0	0.067549	0.0672287	0.692636	0.259382	0.065704	0.0449259	0.339241	-2.91669	0.019446	0.721095	-
NONRATT028816.2	8:90387338-90388899	1562	25	0	0	59	60	26	0.665614	0	0	1.66725	1.74616	0.766271	0.221871	1.39323	-2.65063	0.0195044	0.722002	-
NONRATT021562.2	4:117158715-117159690	976	47	24	19	15	6	18	2.00265	1.16444	0.917828	0.67837	0.279471	0.84901	1.36164	0.602284	1.17683	0.0196319	0.723515	-
NONRATT004422.2	10:54529365-54753303	606	2	2	6	20	12	4	0.137237	0.156277	0.466843	1.45677	0.900133	0.303863	0.253452	0.886921	-1.80709	0.0196799	0.723515	-
NONRATT017442.2	20:46355105-46357419	722	50	57	24	17	30	10	2.88003	3.7385	1.56729	1.03929	1.88882	0.637607	2.7286	1.18857	1.19894	0.019717	0.723515	-
NONRATT018895.2	3:163814945-163817911	556	33	19	18	6	7	17	2.46833	1.61822	1.52639	0.476307	0.572318	1.40759	1.87098	0.818739	1.19232	0.0197187	0.723515	-
NONRATT021235.2	4:34279319-34280129	304	10	5	28	3	8	0	1.36799	0.778814	4.34256	0.435644	1.19623	0	2.16312	0.543958	1.99155	0.0197358	0.723515	-
NONRATT027379.2	7:145147278-145148275	601	21	23	43	67	66	71	1.45311	1.81221	3.37334	4.92078	4.99204	5.43855	2.21289	5.11712	-1.2094	0.0197496	0.723515	-
NONRATT019486.2	3:82334735-82368287	391	13	0	0	0	0	0	1.38265	0	0	0	0	0	0.460883	0	1	0.0198067	0.724358	-
NONRATT007430.2	12:30160775-30165923	484	224	173	60	78	52	71	19.247	16.9263	5.84489	7.11348	4.88388	6.75324	14.0061	6.2502	1.16408	0.0199121	0.726964	-
NONRATT014629.2	19:37526414-37527172	409	7	5	7	3	2	1	0.711784	0.578874	0.80693	0.323804	0.222339	0.112613	0.699196	0.219585	1.67092	0.0200017	0.728983	-
NONRATT026101.2	7:120167189-120167847	659	6	6	5	3	1	1	0.37866	0.431125	0.357712	0.200965	0.0689609	0.0698915	0.389165	0.113272	1.78059	0.0200672	0.729497	-
NONRATT026456.2	7:11394890-11400807	791	0	0	0	15	0	0	0	0	0	0.837028	0	0	0	0.279009	-1	0.0201032	0.729497	-
NONRATT020730.2	4:124776115-124776972	858	13	18	19	5	9	9	0.630089	0.99345	1.04406	0.257239	0.476859	0.482914	0.889198	0.405671	1.1322	0.0201265	0.729497	-
NONRATT004897.2	10:89069454-89070601	376	0	0	0	1	2	4	0	0	0	0.117447	0.241852	0.489736	0	0.283012	-1	0.0201532	0.729497	-
NONRATT027142.2	7:122915847-122923501	578	0	0	0	1	4	2	0	0	0	0.0764015	0.314579	0.159291	0	0.183424	-1	0.0203269	0.734535	-
NONRATT007205.2	12:789513-792039	1088	33	61	40	136	84	111	1.26139	2.65501	1.73341	5.51747	3.50961	4.69667	1.88327	4.57458	-1.2804	0.0203863	0.73543	-
NONRATT026288.2	7:141973542-141974083	542	46	33	48	488	31	39	3.52953	2.88322	4.17548	39.7422	2.60003	3.31254	3.52941	15.2183	-2.1083	0.0205302	0.738348	-
NONRATT016117.2	2:49128333-49138801	397	0	0	0	3	0	5	0	0	0	0.333591	0	0.579847	0	0.304479	-1	0.0205367	0.738348	-
NONRATT020911.2	4:157651735-157652489	405	50	3	3	5	3	5	5.13427	0.350755	0.349209	0.544966	0.336745	0.568393	1.94474	0.483368	2.00839	0.0206838	0.742301	-
NONRATT029964.2	9:46286319-46298114	729	46	29	13	0	20	6	2.62415	1.88381	0.840797	0	1.24716	0.378891	1.78292	0.542017	1.71783	0.0207165	0.742301	-
NONRATT029307.2	9:41100448-41101108	661	4	1	2	0	0	0	0.251635	0.0716367	0.142666	0	0	0	0.155313	0	1	0.020759	0.742571	-
NONRATT011318.2	16:11028708-11029265	558	4	18	1	2	0	2	0.298084	1.52756	0.0844575	0.1582	0	0.165001	0.636702	0.107734	2.56315	0.0208319	0.743927	-
NONRATT008153.2	13:35235994-35239709	688	25	26	18	9	7	16	1.51118	1.78953	1.23354	0.577416	0.462513	1.07059	1.51141	0.703505	1.10327	0.0210367	0.746793	-
NONRATT017935.2	3:6539099-6581345	5305	13	6	82	173	94	83	0.101907	0.0535554	0.728776	1.43944	0.805476	0.720262	0.294746	0.988392	-1.74561	0.0210797	0.746793	-
MSTRG.6365.1	13:71685118-71774335	1467	44	41	30	86	78	111	1.24734	1.32346	0.964171	2.58761	2.417	3.48328	1.17832	2.8293	-1.26371	0.0211004	0.746793	-
NONRATT016768.2	2:210803869-210805276	593	1299	1265	451	1	330	260	91.0991	101.018	35.8582	0.0744689	25.2971	20.1845	75.9917	15.1853	2.32316	0.0211769	0.746793	-
NONRATT028692.2	8:70192662-70203392	784	0	0	0	0	14	0	0	0	0	0	0.811757	0	0	0.270586	-1	0.0212216	0.746793	-
NONRATT015323.2	2:151314797-151320380	1637	0	0	0	0	0	14	0	0	0	0	0	0.393704	0	0.131235	-1	0.0212283	0.746793	-
NONRATT027436.2	8:13835430-13836875	708	16	16	23	9	11	6	0.939837	1.07016	1.53165	0.561105	0.706265	0.390129	1.18055	0.5525	1.09541	0.0212494	0.746793	-
NONRATT002824.2	1:142712552-142713073	522	7	6	8	4	1	2	0.5577	0.544274	0.722623	0.338221	0.0870598	0.17638	0.608199	0.200554	1.60056	0.0212779	0.746793	-
NONRATT013372.2	18:29644637-29645140	504	39	19	4	4	4	12	3.21803	1.78518	0.374215	0.3503	0.360768	1.09608	1.79248	0.602381	1.57321	0.0212826	0.746793	-
MSTRG.6241.1	13:50596108-50636165	900	6	41	3	57	56	78	0.277263	2.15724	0.157144	2.79552	2.82852	3.98977	0.863884	3.2046	-1.89124	0.0212919	0.746793	-
NONRATT020590.2	4:109413755-109414287	533	0	1	0	5	4	1	0	0.0888403	0	0.414092	0.341139	0.0864137	0.0296134	0.280548	-3.24393	0.0212988	0.746793	-
NONRATT007552.2	12:40619345-40619778	235	5	3	0	0	0	0	0.884911	0.604492	0	0	0	0	0.496468	0	1	0.0213869	0.748646	-
NONRATT017118.2	20:5050570-5051290	585	6	10	12	17	30	22	0.426559	0.809514	0.967121	1.28267	2.33115	1.73124	0.734398	1.78169	-1.27861	0.021664	0.757101	-
NONRATT003100.2	1:189186034-189193264	1053	155	130	403	773	452	528	6.12157	5.84622	18.0444	32.4028	19.5129	23.0836	10.0041	24.9997	-1.32133	0.021782	0.759972	-
NONRATT021848.2	4:157435371-157439790	1421	349	37	59	34	54	58	10.2139	1.23301	1.9576	1.05614	1.72747	1.87902	4.46817	1.55421	1.5235	0.0218196	0.760038	-
NONRATT005849.2	10:74881456-74882801	1346	40	17	58	94	89	97	1.23586	0.59809	2.03167	3.08256	3.00578	3.3176	1.28854	3.13531	-1.28287	0.0220945	0.768352	-
NONRATT019305.2	3:43166976-43182853	768	3	7	6	16	11	17	0.162433	0.431593	0.368368	0.919595	0.651088	1.01904	0.320798	0.863241	-1.4281	0.0221455	0.768869	-
NONRATT022456.2	5:126946899-126968109	683	3	5	0	0	0	0	0.182648	0.346646	0	0	0	0	0.176431	0	1	0.0222342	0.770689	-
NONRATT022683.2	5:150019696-150027049	610	15	6	8	6	0	4	1.02266	0.465756	0.618376	0.434142	0	0.30187	0.702264	0.245337	1.51724	0.0222705	0.770691	-
NONRATT030869.2	X:10771114-10771721	608	15	17	9	9	6	2	1.02602	1.32406	0.697922	0.653392	0.448624	0.151432	1.016	0.417816	1.28196	0.0226167	0.781224	-
NONRATT006443.2	11:31806636-31812815	416	63	68	99	14	21	62	6.29807	7.74066	11.2204	1.48551	2.29477	6.86113	8.41972	3.54714	1.24712	0.0226484	0.781224	-
NONRATT024952.2	6:50598258-50598968	616	17	6	19	4	5	8	1.14771	0.46122	1.45422	0.286609	0.368948	0.59786	1.02105	0.417806	1.28915	0.0226925	0.781475	-
NONRATT000537.2	1:85397300-85399748	1925	89	26	121	24	47	25	1.92274	0.639582	2.9636	0.550313	1.10988	0.597872	1.84197	0.752689	1.29113	0.0228817	0.786716	-
NONRATT016794.2	2:211706246-211714844	2139	6	10	2	19	13	19	0.11666	0.221396	0.0440871	0.392071	0.276284	0.408926	0.127381	0.359094	-1.49521	0.0229565	0.788014	-
NONRATT003758.2	1:259459441-259463061	294	8	16	3	2	4	2	1.13164	2.57713	0.481053	0.300257	0.618459	0.313165	1.39661	0.410627	1.76603	0.0230016	0.788286	-
NONRATT003603.2	1:229020606-229021076	471	6	10	2	3	1	0	0.529802	1.00545	0.200217	0.28118	0.0964866	0	0.578489	0.125889	2.20014	0.0230937	0.789486	-
NONRATT004541.2	10:59819077-59824202	461	6	2	2	18	12	5	0.541295	0.205431	0.20456	1.72348	1.18326	0.499348	0.317095	1.13536	-1.84016	0.0231109	0.789486	-
NONRATT028680.2	8:68569531-68570340	810	19	11	30	8	10	9	0.975497	0.643108	1.74622	0.435929	0.561223	0.511531	1.12161	0.502894	1.15724	0.0233664	0.795958	-
ENSRNOT00000088061	4:157753691-157755858	1952	0	1	3	7	5	5	0	0.0242581	0.0724537	0.158292	0.11643	0.11793	0.0322373	0.130884	-2.02149	0.0234132	0.795958	-
NONRATT016005.2	2:20898483-20898797	315	28	20	9	6	6	12	3.69663	3.00662	1.3471	0.84072	0.865916	1.75372	2.68345	1.15345	1.21813	0.0234286	0.795958	-
NONRATT003199.2	1:198574353-198575385	1033	3	6	2	8	9	19	0.120763	0.275035	0.0912897	0.341822	0.396075	0.84675	0.162363	0.528215	-1.70191	0.0234502	0.795958	-
NONRATT025686.2	7:26989410-26995661	893	4	5	3	10	13	11	0.186261	0.265128	0.158376	0.494264	0.661783	0.567089	0.203255	0.574379	-1.49871	0.0235495	0.796879	-
NONRATT003917.2	1:274070604-274087953	762	3	9	6	15	16	17	0.163712	0.559335	0.371269	0.868883	0.954472	1.02706	0.364772	0.950139	-1.38114	0.0235683	0.796879	-
NONRATT019691.2	3:123226974-123227795	665	6	5	14	27	16	21	0.375243	0.356029	0.992584	1.79216	1.0937	1.45378	0.574619	1.44655	-1.33193	0.0235899	0.796879	-
NONRATT019196.2	3:12020227-12024616	1323	12	0	0	0	0	0	0.377198	0	0	0	0	0	0.125733	0	1	0.0237494	0.800997	-
NONRATT014364.2	19:55427134-55428550	1417	9	5	1	2	16	54	0.264139	0.167085	0.0332585	0.0622975	0.513273	1.75437	0.154828	0.776648	-2.3266	0.0239661	0.807022	-
NONRATT019697.2	3:123578533-123579206	674	7	15	11	6	6	0	0.431928	1.05389	0.769494	0.392918	0.404694	0	0.751772	0.265871	1.49957	0.0240236	0.807678	-
NONRATT008739.2	13:52084031-52085430	851	36	38	30	77	66	98	1.75927	2.11453	1.66209	3.99385	3.52552	5.30146	1.8453	4.27361	-1.2116	0.0243045	0.815832	-
NONRATT029930.2	9:43547008-43549879	2872	0	0	0	14	0	0	0	0	0	0.215172	0	0	0	0.071724	-1	0.0245987	0.824405	-
NONRATT000414.2	1:79898551-79909333	1939	1	0	1	12	5	0	0.0214455	0	0.0243049	0.273181	0.117211	0	0.0152501	0.130131	-3.09307	0.0246879	0.824885	-
NONRATT016602.2	2:189086867-189087667	801	10	8	8	5	3	3	0.519186	0.472928	0.470923	0.275545	0.170264	0.172446	0.487679	0.206085	1.24269	0.0247295	0.824885	-
NONRATT019681.2	3:121310130-121310916	787	13	11	15	7	8	2	0.686933	0.661903	0.898657	0.392614	0.462076	0.116989	0.749164	0.323893	1.20977	0.0249409	0.830633	-
NONRATT014796.2	19:55703838-55862204	5600	140	673	129	129	109	135	1.03968	5.69101	1.0861	1.0168	0.884805	1.1098	2.60559	1.0038	1.37614	0.0250103	0.83164	-
NONRATT023327.2	5:88586012-88630251	1361	25	9	17	8	10	4	0.763916	0.313162	0.588939	0.259443	0.334012	0.135298	0.555339	0.242918	1.1929	0.025097	0.83292	-
NONRATT026583.2	7:15231593-15242007	1026	0	1	0	4	2	3	0	0.0461519	0	0.172077	0.0886321	0.134629	0.015384	0.131779	-3.09862	0.0251966	0.83292	-
NONRATT025222.2	6:107467942-107468329	388	19	21	9	10	6	6	2.03648	2.56298	1.09365	1.13757	0.702999	0.711885	1.8977	0.850818	1.15733	0.02522	0.83292	-
ENSRNOT00000081933	9:71388275-71398583	1314	9	1	4	0	2	0	0.284844	0.0360364	0.143535	0	0.0692059	0	0.154805	0.0230686	2.74645	0.025334	0.83292	-
NONRATT021258.2	4:48879768-48927622	607	33	20	15	19	2	1	2.26094	1.56027	1.16515	1.38162	0.149813	0.0758789	1.66212	0.535769	1.63334	0.0253458	0.83292	-
NONRATT020616.2	4:114885719-114887317	964	26	51	65	43	81	336	1.12165	2.50528	3.17911	1.96892	3.81963	16.0458	2.26868	7.2781	-1.68171	0.0255129	0.83292	-
NONRATT003063.2	1:176940418-176942159	1742	0	0	0	0	13	0	0	0	0	0	0.339249	0	0	0.113083	-1	0.0255169	0.83292	-
NONRATT003515.2	1:222232351-222233696	402	0	12	0	0	0	0	0	1.4136	0	0	0	0	0.471202	0	1	0.0255243	0.83292	-
NONRATT006681.2	11:80736445-80736965	521	6	2	5	22	8	9	0.478957	0.181773	0.45246	1.86387	0.697992	0.795279	0.371064	1.11905	-1.59253	0.0255264	0.83292	-
NONRATT026454.2	7:11394372-11400714	753	0	12	0	0	0	0	0	0.754674	0	0	0	0	0.251558	0	1	0.0255423	0.83292	-
NONRATT002080.2	1:37951455-37952034	580	11	12	3	88	13	8	0.788708	0.979774	0.243844	6.69708	1.01892	0.634968	0.670775	2.78365	-2.05308	0.0255823	0.83292	-
MSTRG.22617.2	9:76024319-76036594	12236	152	179	480	287	1230	772	0.516612	0.692747	1.84956	1.03532	4.56958	2.90453	1.01964	2.83648	-1.47604	0.0256141	0.83292	-
NONRATT012398.2	17:27333930-27334434	505	0	0	1	2	4	3	0	0	0.0933214	0.174803	0.360053	0.273523	0.0311071	0.26946	-3.11475	0.0256185	0.83292	-
NONRATT011886.2	16:21022535-21027024	512	77	58	42	10	39	31	6.25429	5.36435	3.86768	0.862066	3.46264	2.78733	5.16211	2.37068	1.12266	0.0256633	0.83292	-
ENSRNOT00000080542	12:17720600-17729778	533	0	1	0	3	4	2	0	0.0888403	0	0.248472	0.341139	0.17274	0.0296134	0.254117	-3.10117	0.0256882	0.83292	-
NONRATT007737.2	12:9998760-9999970	601	4	35	0	4	2	0	0.276757	2.75775	0	0.293762	0.151309	0	1.0115	0.148357	2.76936	0.0257151	0.83292	-
NONRATT001282.2	1:203102238-203103386	1149	6	8	57	7	6	9	0.217177	0.329691	2.33895	0.268918	0.237392	0.360609	0.961938	0.288973	1.73501	0.0257736	0.833542	-
NONRATT007739.2	12:11122779-11144800	389	38	22	7	6	6	14	4.06248	2.67812	0.848417	0.680789	0.701191	1.65679	2.52967	1.01292	1.32042	0.0258727	0.834373	-
NONRATT003484.2	1:221346081-221348944	1000	8	51	14	12	7	8	0.332702	2.41509	0.660068	0.529698	0.318209	0.368282	1.13595	0.405396	1.4865	0.0258778	0.834373	-
NONRATT014469.2	19:11384112-11386236	716	4	2	1	10	4	10	0.232306	0.132268	0.0658202	0.61645	0.253948	0.64295	0.143465	0.504449	-1.81401	0.0259346	0.834938	-
ENSRNOT00000080586	7:75167065-75170461	1199	33	35	58	14	33	11	1.14461	1.38233	2.28075	0.515408	1.25113	0.422361	1.60256	0.729633	1.13514	0.0261729	0.841334	-
NONRATT005361.2	10:25903925-25906664	847	50	14	9	12	7	9	2.45499	0.782731	0.500988	0.625381	0.375689	0.489186	1.24624	0.496752	1.32698	0.026317	0.843791	-
NONRATT004676.2	10:71336124-71357902	556	0	23	16	0	0	6	0	1.95888	1.35678	0	0	0.496783	1.10522	0.165594	2.73861	0.0263287	0.843791	-
NONRATT003284.2	1:205951845-205953876	2032	55	30	81	23	30	28	1.12564	0.699139	1.87944	0.499624	0.671124	0.634343	1.23474	0.601697	1.0371	0.0264709	0.846616	-
NONRATT008914.2	13:84083801-84087520	742	29	37	49	29	17	11	1.62536	2.36134	3.11359	1.72515	1.04151	0.682494	2.36677	1.14972	1.04164	0.0264966	0.846616	-
NONRATT014457.2	19:10592787-10596842	561	24	11	6	4	9	2	1.77916	0.928551	0.50429	0.314708	0.729314	0.164118	1.07067	0.402713	1.41068	0.0265758	0.847872	-
NONRATT021826.2	4:155947763-155957240	1023	5	11	8	40	17	11	0.203279	0.509206	0.368728	1.72591	0.755424	0.495025	0.360404	0.992118	-1.4609	0.0266329	0.848419	-
NONRATT006027.2	10:88672836-88674497	487	12	3	2	0	3	0	1.02471	0.291695	0.193639	0	0.280045	0	0.503348	0.0933482	2.43086	0.0272205	0.86584	-
MSTRG.450.1	1:54909812-54931503	790	21	99	124	34	29	39	1.10547	5.93432	7.40052	1.89971	1.66871	2.27265	4.81344	1.94703	1.3058	0.0273991	0.869633	-
NONRATT025797.2	7:54233690-54237880	2552	56	51	42	42	92	320	0.912569	0.94635	0.775961	0.726441	1.63878	5.77255	0.878293	2.71259	-1.6269	0.0274892	0.869633	-
NONRATT026180.2	7:125607858-125609269	1412	28	18	24	16	13	6	0.824673	0.603669	0.801402	0.500177	0.418535	0.195617	0.743248	0.371443	1.0007	0.0275187	0.869633	-
NONRATT003210.2	1:198829267-198829964	698	61	40	33	13	12	36	3.63443	2.71371	2.22911	0.822083	0.781491	2.37438	2.85908	1.32598	1.10849	0.027596	0.869633	-
NONRATT027769.2	8:65733160-65733509	350	21	10	22	5	2	14	2.4952	1.35304	2.96365	0.630604	0.259819	1.84141	2.27063	0.91061	1.31819	0.0276988	0.869633	-
NONRATT012873.2	17:22279170-22279991	822	4	3	3	10	13	7	0.202349	0.172817	0.172055	0.536956	0.718944	0.392056	0.182407	0.549319	-1.59048	0.0277021	0.869633	-
NONRATT014467.2	19:11301986-11303133	982	969	1119	257	164	560	188	41.0367	53.961	12.3393	7.37164	25.9231	8.8134	35.779	14.0361	1.34997	0.0277081	0.869633	-
NONRATT009803.2	14:21103401-21128251	684	0	2	14	33	23	7	0	0.138456	0.965012	2.12955	1.52853	0.471155	0.367823	1.37641	-1.90383	0.027824	0.871983	-
NONRATT021480.2	4:99252264-99255198	402	0	0	0	4	0	3	0	0	0	0.439182	0	0.343604	0	0.260929	-1	0.0279746	0.875411	-
NONRATT027450.2	8:13888633-13896085	1179	6	8	5	0	3	3	0.211651	0.321302	0.199942	0	0.115676	0.117158	0.244298	0.0776112	1.65431	0.0283886	0.887061	-
NONRATT000632.2	1:98399627-98403390	645	0	0	0	3	4	0	0	0	0	0.205327	0.281902	0	0	0.16241	-1	0.0285112	0.889584	-
NONRATT006607.2	11:65960246-65960903	658	44	34	632	51	97	37	2.78092	2.4469	45.2854	3.42118	6.70126	2.58864	16.8377	4.23703	1.99057	0.0287233	0.894886	-
NONRATT003888.2	1:266829063-266830963	780	6	6	9	12	14	29	0.319919	0.364245	0.544021	0.6791	0.81592	1.7116	0.409395	1.06887	-1.38452	0.0288087	0.896235	-
NONRATT020195.2	4:25525218-25527082	501	11	19	4	5	3	5	0.913075	1.79587	0.376456	0.440541	0.272219	0.45948	1.02847	0.390747	1.39619	0.0288519	0.896266	-
NONRATT029492.2	9:80830495-80882941	865	0	0	0	1	5	1	0	0	0	0.0510521	0.262742	0.0532468	0	0.122347	-1	0.0289771	0.898839	-
NONRATT014888.2	2:11818407-11820584	2178	114	45	118	204	240	197	2.17675	0.978409	2.55441	4.13432	5.00915	4.16396	1.90319	4.43581	-1.22078	0.0290718	0.900464	-
NONRATT022327.2	5:79077924-79078877	954	4	3	5	15	7	12	0.174351	0.148905	0.247098	0.694014	0.333552	0.579059	0.190118	0.535542	-1.4941	0.0291599	0.901399	-
MSTRG.21473.1	8:85006594-85008839	856	16	9	7	12	27	51	0.777342	0.497913	0.385554	0.618806	1.43387	2.74278	0.553603	1.59848	-1.52978	0.0292432	0.901399	-
NONRATT007774.2	12:14161998-14163659	1549	43	10	121	22	10	29	1.15446	0.305723	3.68298	0.626905	0.293473	0.861875	1.71439	0.594085	1.52895	0.0293215	0.901399	-
NONRATT015383.2	2:185342207-185392347	451	1	3	21	22	32	24	0.0922012	0.314979	2.19535	2.15316	3.22541	2.44977	0.86751	2.60945	-1.58879	0.0293384	0.901399	-
NONRATT006173.2	10:94572436-94576500	665	1	1	0	6	5	1	0.0625305	0.0712058	0	0.398236	0.341763	0.0692609	0.0445788	0.269753	-2.59721	0.0293566	0.901399	-
NONRATT030618.2	X:76042888-76046468	1057	71	18	29	19	18	16	2.79347	0.806415	1.29358	0.793416	0.774119	0.696843	1.63115	0.754793	1.11174	0.0294251	0.902199	-
NONRATT025772.2	7:41402818-41404003	1186	8	13	6	5	3	3	0.280525	0.519073	0.238539	0.186097	0.114993	0.116466	0.346046	0.139185	1.31395	0.0294892	0.902864	-
NONRATT022503.2	5:133420338-133420880	543	41	29	125	170	146	169	3.14014	2.52909	10.8537	13.8191	12.2226	14.3279	5.50763	13.4566	-1.28881	0.0295349	0.902962	-
NONRATT003319.2	1:212324426-212325546	686	4	4	3	2	0	0	0.242465	0.276104	0.206166	0.128682	0	0	0.241578	0.0428939	2.49365	0.0299042	0.911659	-
NONRATT018217.2	3:55904544-55907722	683	12	18	5	7	4	3	0.730649	1.24799	0.345142	0.452397	0.266218	0.202239	0.774595	0.306951	1.33543	0.0299229	0.911659	-
NONRATT009662.2	14:115223974-115229061	635	3	3	5	14	5	12	0.196454	0.22371	0.371231	0.973187	0.357909	0.869957	0.263798	0.733684	-1.47572	0.0299481	0.911659	-
ENSRNOT00000089288	19:52051267-52061809	2717	37	195	450	123	74	47	0.566332	3.39865	7.8089	1.99823	1.2381	0.796348	3.92463	1.34423	1.54578	0.0300166	0.912437	-
NONRATT000641.2	1:99528861-99537598	745	9	1	1	23	1	33	0.502396	0.0635596	0.0632581	1.36273	0.0610003	2.03917	0.209738	1.1543	-2.46036	0.0301079	0.913905	-
NONRATT020823.2	4:148230187-148256717	374	0	4	3	0	0	0	0	0.506437	0.378154	0	0	0	0.294864	0	1	0.0304447	0.919443	-
NONRATT007189.2	11:88173646-88185944	900	0	11	0	0	0	0	0	0.578797	0	0	0	0	0.192932	0	1	0.0304476	0.919443	-
NONRATT002949.2	1:163544320-163551251	1794	0	11	0	0	0	0	0	0.290366	0	0	0	0	0.0967888	0	1	0.0304552	0.919443	-
NONRATT024859.2	6:26763900-26764658	759	4	7	1	0	2	0	0.219145	0.43671	0.0620913	0	0.119811	0	0.239316	0.039937	2.58312	0.030509	0.919443	-
NONRATT006870.2	11:31730191-31751959	400	17	9	8	8	3	3	1.76747	1.06553	0.943023	0.882756	0.340954	0.345322	1.25868	0.523011	1.26699	0.0305563	0.919443	-
NONRATT021766.2	4:150467418-150471770	377	16	2	18	4	5	4	1.765	0.251204	2.25112	0.468306	0.602844	0.488437	1.42244	0.519862	1.45217	0.0305834	0.919443	-
NONRATT003340.2	1:213907670-213909173	724	0	0	0	0	12	0	0	0	0	0	0.753426	0	0	0.251142	-1	0.0305933	0.919443	-
ENSRNOT00000083620	5:126222097-126223761	483	5	2	4	1	0	1	0.430547	0.196074	0.390486	0.0914287	0	0.0953593	0.339035	0.0622627	2.445	0.0306982	0.920583	-
NONRATT029150.2	9:14551773-14565532	364	1	5	1	0	0	0	0.114238	0.650438	0.129471	0	0	0	0.298049	0	1	0.0307179	0.920583	-
NONRATT015869.2	2:254341164-254347735	792	3	4	0	0	0	0	0.15751	0.239151	0	0	0	0	0.13222	0	1	0.0309059	0.923687	-
NONRATT004637.2	10:67457935-67470676	716	2	2	9	0	2	0	0.116153	0.132268	0.592649	0	0.127006	0	0.280356	0.0423354	2.72733	0.0309305	0.923687	-
NONRATT027021.2	7:116419579-116422169	768	69	134	40	42	30	43	3.73637	8.2624	2.45566	2.4139	1.77568	2.57752	4.81815	2.2557	1.0949	0.0309519	0.923687	-
NONRATT017403.2	20:32571774-32573590	553	13	16	10	5	9	4	0.977606	1.37012	0.852557	0.399116	0.739865	0.332985	1.06676	0.490655	1.12046	0.0310502	0.924143	-
NONRATT018452.2	3:105470970-105477512	512	0	5	2	13	5	9	0	0.462421	0.184184	1.12073	0.443891	0.809258	0.215535	0.791293	-1.87629	0.0310933	0.924143	-
NONRATT004170.2	10:24040831-24049850	1077	3	5	2	26	10	3	0.115829	0.219832	0.0875602	1.06558	0.422089	0.128253	0.141074	0.53864	-1.93287	0.0312112	0.925408	-
NONRATT029793.2	9:15379381-15389897	1582	14	14	7	10	48	40	0.36804	0.419073	0.208618	0.279	1.37925	1.164	0.33191	0.940751	-1.50302	0.0312273	0.925408	-
NONRATT009400.2	14:63096785-63120478	525	2	4	5	6	24	6	0.158411	0.360776	0.449013	0.504432	2.07811	0.526117	0.322733	1.03622	-1.68292	0.0313751	0.928458	-
NONRATT028808.2	8:87154563-87158029	371	1	0	0	0	4	7	0.112083	0	0	0	0.4901	0.868652	0.037361	0.452917	-3.59964	0.031459	0.928458	-
NONRATT008192.2	13:48426865-48427544	582	0	0	0	2	2	2	0	0	0	0.151676	0.156248	0.158197	0	0.155374	-1	0.0314613	0.928458	-
ENSRNOT00000078319	17:15108456-15111712	1065	673	487	188	168	168	289	26.28	21.6542	8.3229	6.96292	7.17086	12.4924	18.7523	8.8754	1.07919	0.0316203	0.930677	-
NONRATT014866.2	2:2551303-2552296	994	2	3	2	5	8	9	0.0836675	0.142913	0.0948715	0.222044	0.365849	0.416841	0.107151	0.334911	-1.64414	0.0316241	0.930677	-
NONRATT001090.2	1:174778833-174779246	414	3	3	4	10	7	10	0.301324	0.34313	0.455567	1.06613	0.76862	1.11196	0.366673	0.982237	-1.42158	0.0316972	0.930867	-
NONRATT017555.2	20:4806945-4808550	1606	165	136	259	19	139	69	4.27265	4.0101	7.60362	0.522192	3.93442	1.9779	5.29546	2.14484	1.30389	0.0317505	0.930867	-
NONRATT002193.2	1:56661958-56667785	917	1	1	2	4	7	4	0.0453465	0.0516378	0.102838	0.192531	0.347011	0.200808	0.0666074	0.246783	-1.88949	0.0317932	0.930867	-
NONRATT030577.2	X:71155279-71155851	573	12	47	13	12	11	7	0.870913	3.88426	1.06971	0.924429	0.872662	0.562425	1.94162	0.786506	1.30373	0.0318123	0.930867	-
NONRATT002602.2	1:100808628-100811904	643	185	143	59	70	73	43	11.9652	10.5314	4.32621	4.80526	5.16084	3.0786	8.94093	4.34823	1.04	0.0318896	0.930867	-
NONRATT020486.2	4:84854474-84863023	638	17	19	15	45	33	35	1.10813	1.41024	1.10853	3.11334	2.35126	2.52548	1.20897	2.66336	-1.13947	0.0318934	0.930867	-
NONRATT006775.2	11:89513250-89514199	405	8	7	10	3	5	3	0.821487	0.818427	1.16411	0.327002	0.561166	0.341059	0.934674	0.409742	1.18975	0.0320697	0.932964	-
NONRATT030503.2	X:32304720-32308763	684	5	6	4	6	12	29	0.304026	0.415367	0.275738	0.387174	0.797486	1.95182	0.33171	1.04549	-1.65619	0.0321026	0.932964	-
NONRATT020555.2	4:99937574-99989486	762	7	8	4	3	0	3	0.382047	0.497133	0.247513	0.1738	0	0.181272	0.375564	0.118357	1.66591	0.0321409	0.932964	-
MSTRG.5121.1	11:77644891-77650719	3168	418	320	125	181	84	141	5.4872	4.78328	1.86033	2.52188	1.20532	2.04895	4.0436	1.92538	1.0705	0.032317	0.934955	-
NONRATT015297.2	2:144934177-144939391	5215	17	8	8	35	26	19	0.135568	0.0726395	0.0723316	0.29624	0.226634	0.167726	0.093513	0.2302	-1.29965	0.0323521	0.934955	-
NONRATT027309.2	7:139293200-139294755	425	2	2	6	10	11	7	0.195684	0.222832	0.665663	1.03854	1.17655	0.758282	0.361393	0.991124	-1.4555	0.0323804	0.934955	-
MSTRG.22046.4	9:4074596-4077636	1968	78	0	76	190	204	231	1.64828	0	1.82078	4.26147	4.71212	5.40363	1.15635	4.79241	-2.05117	0.0323912	0.934955	-
NONRATT015126.2	2:84327505-84328998	1494	31	42	43	75	163	50	0.862909	1.33124	1.35701	2.21586	4.9596	1.5407	1.18372	2.90539	-1.2954	0.0324295	0.934955	-
NONRATT015588.2	2:198423732-198424453	722	17	20	53	49	85	82	0.979207	1.31175	3.461	2.99566	5.35173	5.22844	1.91732	4.52528	-1.23891	0.0326344	0.938819	-
ENSRNOT00000086515	1:208521333-208522639	610	0	0	0	3	1	2	0	0	0	0.217108	0.0745003	0.150935	0	0.147514	-1	0.032695	0.938819	-
NONRATT005501.2	10:47526203-47528384	743	5	3	4	21	14	4	0.279884	0.191192	0.253842	1.24753	0.856551	0.247834	0.241639	0.783972	-1.69795	0.0326961	0.938819	-
NONRATT028327.2	8:22326663-22336857	850	105	95	70	119	290	231	5.13726	5.29254	3.88281	6.17958	15.5092	12.511	4.77087	11.3999	-1.2567	0.0329591	0.939637	-
NONRATT004493.2	10:57132535-57132857	323	11	11	10	6	5	4	1.41626	1.61275	1.45964	0.819897	0.703629	0.570095	1.49621	0.697874	1.10028	0.0329804	0.939637	-
NONRATT012959.2	17:42583936-42586365	2430	26	43	43	86	68	97	0.444968	0.837952	0.834313	1.56215	1.27208	1.83765	0.705744	1.55729	-1.14182	0.0330226	0.939637	-
NONRATT010504.2	15:41080520-41080965	446	0	0	0	2	3	1	0	0	0	0.197927	0.305789	0.10327	0	0.202329	-1	0.0330256	0.939637	-
MSTRG.2087.17	1:215931868-215934280	413	13	5	7	17	10	45	1.309	0.573267	0.799114	1.81686	1.1007	5.016	0.893793	2.64452	-1.56499	0.0330302	0.939637	-
NONRATT013783.2	18:31328395-31329024	630	16	32	26	49	62	55	1.0562	2.40532	1.94577	3.43312	4.47363	4.01898	1.80243	3.97524	-1.1411	0.0330341	0.939637	-
NONRATT027443.2	8:13868419-13871339	688	68	44	73	56	8	5	4.11039	3.02852	5.00264	3.59281	0.528567	0.334592	4.04719	1.48532	1.44614	0.0331198	0.939643	-
NONRATT030233.2	9:91775865-91776569	705	4	6	7	11	14	17	0.235931	0.402995	0.468134	0.688706	0.90272	1.1101	0.36902	0.900509	-1.28704	0.0331592	0.939643	-
NONRATT022043.2	5:8978018-8980011	703	63	107	30	28	32	36	3.72688	7.20758	2.012	1.75804	2.06922	2.35749	4.31549	2.06158	1.06577	0.0332385	0.940415	-
NONRATT001228.2	1:198983568-198984499	407	22	9	28	10	4	12	2.24791	1.04721	3.24358	1.08447	0.446749	1.3573	2.17957	0.96284	1.17867	0.0332909	0.940644	-
NONRATT018282.2	3:63257650-63379292	546	11	24	14	9	7	7	0.837822	2.08149	1.20892	0.727587	0.5828	0.590238	1.37607	0.633541	1.11905	0.0334148	0.942892	-
NONRATT000986.2	1:164102027-164110288	745	5	9	15	27	21	20	0.279133	0.572099	0.94932	1.59971	1.28138	1.23584	0.600184	1.37231	-1.19313	0.0337355	0.95068	-
NONRATT023635.2	5:147216988-147217585	525	0	2	5	0	0	0	0	0.180388	0.449013	0	0	0	0.2098	0	1	0.0338617	0.951867	-
NONRATT004622.2	10:65175344-65176436	1093	331	301	277	33	228	125	12.5941	13.0409	11.9488	1.33268	9.48258	5.26488	12.528	5.36005	1.22483	0.0338673	0.951867	-
NONRATT024360.2	6:93543762-93548635	765	0	2	5	0	0	0	0	0.123796	0.308146	0	0	0	0.143981	0	1	0.0339309	0.952397	-
MSTRG.8246.10	15:59625097-59666853	4267	1449	3381	249	403	754	718	14.1223	37.5219	2.75133	4.16882	8.03266	7.7464	18.1318	6.64929	1.44725	0.0341529	0.956101	-
NONRATT005613.2	10:56834364-56838779	676	0	0	17	32	15	23	0	0	1.18572	2.08943	1.00867	1.56632	0.395239	1.55481	-1.97594	0.0342013	0.956198	-
NONRATT026733.2	7:52162717-52164687	1971	130	103	44	48	55	31	2.74293	2.47464	1.05252	1.07494	1.26848	0.724056	2.09003	1.02249	1.03143	0.0343192	0.956395	-
NONRATT014819.2	19:57126111-57126805	695	3	2	1	0	0	0	0.179494	0.136264	0.0678091	0	0	0	0.127856	0	1	0.0343397	0.956395	-
NONRATT001442.2	1:220892492-220893563	1072	39	46	73	9	45	15	1.51296	2.03202	3.21065	0.370581	1.90824	0.644171	2.25188	0.974331	1.20864	0.0344346	0.956427	-
NONRATT031281.2	X:124922146-124922850	401	11	0	0	0	0	0	1.14077	0	0	0	0	0	0.380258	0	1	0.0346288	0.959861	-
NONRATT001343.2	1:214182818-214186682	844	4	4	1	6	9	14	0.197075	0.224416	0.055838	0.313776	0.484769	0.763617	0.15911	0.520721	-1.71049	0.0346486	0.959861	-
NONRATT014544.2	19:24705478-24731983	201	6	3	0	7	10	13	1.24148	0.706744	0	1.53725	2.26164	2.97752	0.649407	2.2588	-1.79836	0.0347141	0.960424	-
NONRATT015663.2	2:207131160-207131906	747	14	15	15	7	3	11	0.779436	0.950903	0.946778	0.413637	0.182573	0.677926	0.892373	0.424712	1.07116	0.0347849	0.961132	-
NONRATT012486.2	17:44025456-44036942	693	3	11	14	3	3	4	0.180012	0.751684	0.95248	0.191105	0.196799	0.265716	0.628059	0.217873	1.52741	0.0349045	0.96225	-
NONRATT018029.2	3:11047041-11070638	1014	13	4	47	112	25	62	0.533152	0.186792	2.18539	4.8754	1.12076	2.81482	0.968445	2.93699	-1.6006	0.0349516	0.96225	-
NONRATT029008.2	8:118187764-118192279	741	12	5	10	20	25	17	0.673459	0.319513	0.636253	1.19136	1.53367	1.05617	0.543075	1.2604	-1.21466	0.0349613	0.96225	-
NONRATT018944.2	3:171037898-171049742	992	58	2	3	4	8	0	2.43149	0.0954675	0.14257	0.177975	0.366587	0	0.889844	0.181521	2.29342	0.0352509	0.968374	-
NONRATT025109.2	6:96167214-96171613	882	13	7	8	2	6	3	0.612943	0.375809	0.427675	0.100086	0.309256	0.156609	0.472142	0.18865	1.32351	0.0352749	0.968374	-
ENSRNOT00000078698	1:141944712-141946193	669	59	29	18	9	13	26	3.66766	2.05276	1.26857	0.593815	0.883366	1.78911	2.32966	1.08876	1.09743	0.0354205	0.971116	-
NONRATT026185.2	7:125938021-125947152	734	2	0	0	4	2	5	0.113305	0	0	0.240533	0.123892	0.313623	0.0377682	0.226016	-2.58118	0.0355226	0.97266	-
NONRATT005818.2	10:73681502-73682068	567	11	18	28	8	6	13	0.806791	1.50332	2.32828	0.622755	0.481064	1.05552	1.54613	0.719781	1.10303	0.035583	0.972767	-
NONRATT015277.2	2:140618691-140619083	393	3	2	2	8	7	6	0.317426	0.240976	0.239955	0.898479	0.809691	0.702828	0.266119	0.803666	-1.59452	0.0357423	0.972767	-
NONRATT008278.2	13:56601290-56604335	798	17	11	51	11	10	13	0.885949	0.652779	3.01327	0.608444	0.569662	0.749976	1.51733	0.642694	1.23933	0.0357812	0.972767	-
NONRATT011361.2	16:19573872-19574625	754	9	4	7	41	13	7	0.496399	0.251204	0.437711	2.40015	0.783783	0.427414	0.395105	1.20378	-1.60727	0.0359152	0.972767	-
NONRATT008239.2	13:52187709-52188403	695	14	2	7	3	2	2	0.837754	0.136264	0.474869	0.190555	0.130844	0.132475	0.482963	0.151291	1.67458	0.0359478	0.972767	-
NONRATT016760.2	2:210725053-210726221	889	8	7	8	4	1	4	0.374243	0.372849	0.424307	0.198595	0.0511195	0.207133	0.390467	0.152282	1.35845	0.0359736	0.972767	-
NONRATT005098.2	10:105791708-105792596	806	6	8	17	35	21	18	0.309599	0.469994	0.994474	1.91674	1.1844	1.02808	0.591355	1.37641	-1.21881	0.0359815	0.972767	-
NONRATT021505.2	4:100757692-100759507	1816	5	41	5	6	5	6	0.114512	1.06912	0.129808	0.14583	0.12515	0.152099	0.437813	0.141026	1.63435	0.0360301	0.972767	-
NONRATT005524.2	10:48929034-48930328	1295	24	31	11	8	17	3	0.770739	1.13359	0.400493	0.272666	0.596756	0.106663	0.768275	0.325362	1.23958	0.036087	0.973068	-
NONRATT022437.2	5:122492049-122493302	1254	5	1	2	31	4	2	0.165833	0.0377607	0.0752012	1.09118	0.144998	0.0734214	0.0929315	0.436533	-2.23185	0.0362344	0.975612	-
NONRATT007980.2	12:38994805-38995143	339	4	4	4	13	8	11	0.490652	0.558724	0.556356	1.69267	1.07273	1.49384	0.535244	1.41974	-1.40736	0.0363625	0.976354	-
NONRATT001841.2	1:267396827-267415761	4260	1243	403	219	347	266	35	12.1345	4.47978	2.42383	3.59543	2.83846	0.378229	6.34603	2.27071	1.48271	0.0364104	0.976354	-
NONRATT028848.2	8:94863283-94874231	1892	99	20	17	15	21	19	2.17608	0.500573	0.42365	0.349941	0.504559	0.462311	1.03343	0.438937	1.23536	0.0366429	0.976354	-
ENSRNOT00000077029	X:73556845-73557268	424	1	1	0	2	3	6	0.0980725	0.111679	0	0.208197	0.321655	0.651442	0.0699172	0.393765	-2.49361	0.0366567	0.976354	-
NONRATT025488.2	7:9935384-9936034	651	14	9	11	9	4	2	0.894376	0.654706	0.79668	0.610234	0.279304	0.141429	0.781921	0.343656	1.18606	0.0367918	0.977434	-
NONRATT010568.2	15:51779896-51817932	747	8	8	5	25	4	35	0.445385	0.507115	0.315571	1.47726	0.24341	2.15697	0.42269	1.29255	-1.61254	0.036801	0.977434	-
NONRATT019197.2	3:12020229-12021145	917	6	13	16	26	24	28	0.272123	0.671342	0.822651	1.2515	1.18976	1.40566	0.588705	1.2823	-1.12312	0.0369702	0.980702	-
NONRATT011720.2	16:3867193-3868075	883	30	19	27	21	144	46	1.41291	1.01895	1.44169	1.04973	7.41331	2.39826	1.29118	3.62044	-1.48747	0.0371568	0.982547	-
NONRATT028294.2	8:21388267-21394781	443	13	12	8	5	7	3	1.22035	1.28277	0.851488	0.49822	0.718304	0.311803	1.1182	0.509442	1.13419	0.0371633	0.982547	-
NONRATT023910.2	5:169491478-169491964	487	5	1	2	13	6	6	0.42701	0.0972318	0.193639	1.17826	0.560089	0.567169	0.239294	0.768507	-1.68328	0.0371841	0.982547	-
NONRATT013695.2	18:16450160-16453163	3004	90	73	56	142	188	150	1.24596	1.15076	0.878935	2.08651	2.84491	2.29874	1.09188	2.41005	-1.14225	0.0372834	0.982547	-
NONRATT012481.2	17:43673988-43674573	586	4	3	20	16	33	23	0.283841	0.242416	1.60917	1.2052	2.55991	1.80688	0.71181	1.85733	-1.38367	0.0373171	0.982547	-
ENSRNOT00000088365	5:133889760-133895461	637	7	13	20	8	4	6	0.457017	0.966438	1.48034	0.554321	0.285443	0.433613	0.967931	0.424459	1.18928	0.0373172	0.982547	-
ENSRNOT00000089552	8:82417718-82421825	2643	3	0	1	7	4	5	0.0471995	0	0.017831	0.116908	0.0687957	0.0870978	0.0216768	0.0909337	-2.06866	0.0375985	0.988729	-
MSTRG.8246.4	15:59625069-59666854	6423	3124	4553	972	1303	1381	1388	20.2271	33.5677	7.13501	8.95442	9.77387	9.94832	20.3099	9.55887	1.08727	0.0379312	0.993522	-
NONRATT012664.2	17:85356089-85358090	712	1	1	1	3	2	9	0.0584028	0.0665054	0.06619	0.186005	0.12772	0.581938	0.0636994	0.298554	-2.22864	0.0379812	0.993522	-
NONRATT007148.2	11:83921583-83926546	670	16	32	0	0	8	0	0.993141	2.26172	0	0	0.542767	0	1.08495	0.180922	2.58419	0.0380346	0.993522	-
NONRATT006431.2	11:30663974-30665044	1053	2	3	5	13	10	5	0.0789796	0.134906	0.223867	0.544932	0.43171	0.218613	0.145917	0.398418	-1.44913	0.0380599	0.993522	-
NONRATT020790.2	4:145440476-145446397	723	4	6	5	13	18	8	0.230057	0.392962	0.326047	0.793656	1.13173	0.50938	0.316355	0.81159	-1.35921	0.0382246	0.994023	-
NONRATT007126.2	11:81421673-81423274	413	0	0	0	0	7	1	0	0	0	0	0.770481	0.111522	0	0.294001	-1	0.0382532	0.994023	-
NONRATT020886.2	4:156779797-156782295	1419	0	2	0	4	0	13	0	0.0667398	0	0.124419	0	0.421763	0.0222466	0.182061	-3.03276	0.0382676	0.994023	-
NONRATT030282.2	9:98515260-98515712	453	12	22	17	12	6	7	1.10162	2.29975	1.76942	1.16931	0.602127	0.711412	1.7236	0.827617	1.05839	0.0384692	0.996388	-
NONRATT017650.2	20:10674150-10675694	627	11	15	7	18	27	33	0.729586	1.13289	0.52637	1.26718	1.95756	2.42294	0.796284	1.88256	-1.24134	0.038499	0.996388	-
NONRATT006938.2	11:44217256-44221946	1349	71	32	3	3	23	5	2.1888	1.12332	0.10484	0.0981732	0.775031	0.170644	1.13899	0.347949	1.7108	0.0384994	0.996388	-
NONRATT005976.2	10:86300155-86301105	784	5	2	3	10	5	13	0.265247	0.120796	0.180395	0.562982	0.289888	0.763369	0.188813	0.538746	-1.51265	0.0392559	1	-
NONRATT002185.2	1:54882339-54884590	621	0	0	28	1	1	1	0	0	2.12582	0.0711112	0.0731807	0.0741683	0.708608	0.0728201	3.28258	0.0393016	1	-
NONRATT013319.2	18:28355634-28356304	671	11	13	1	14	32	26	0.681744	0.917468	0.0702344	0.920974	2.1679	1.78378	0.556482	1.62422	-1.54534	0.0393236	1	-
NONRATT018812.2	3:153208978-153210824	1847	8	24	8	51	25	28	0.180131	0.615318	0.204228	1.21881	0.615297	0.697881	0.333226	0.843995	-1.34074	0.0394694	1	-
NONRATT027180.2	7:124214475-124216485	352	199	199	60	66	100	53	23.5109	26.7714	8.03672	8.27622	12.9142	6.9315	19.4397	9.37399	1.05227	0.0394866	1	-
NONRATT021770.2	4:150547349-150551047	2095	15	29	23	13	3	16	0.297767	0.655512	0.517616	0.273897	0.0650987	0.351582	0.490298	0.230192	1.09082	0.0396543	1	-
NONRATT024191.2	6:49874877-49895502	561	3	6	6	0	4	0	0.222368	0.506437	0.50429	0	0.324112	0	0.411032	0.108037	1.92772	0.0396756	1	-
NONRATT028908.2	8:109482588-109484035	1448	11	14	19	27	40	28	0.315919	0.457854	0.618647	0.823058	1.25574	0.890184	0.46414	0.989661	-1.09238	0.0396833	1	-
NONRATT014144.2	19:25999902-26001320	393	1	1	4	0	0	0	0.105809	0.120488	0.47991	0	0	0	0.235402	0	1	0.0397073	1	-
NONRATT025277.2	6:124929801-124934502	417	4	10	6	2	2	3	0.398875	1.13565	0.678434	0.211692	0.218073	0.331244	0.737653	0.25367	1.53999	0.0399302	1	-
NONRATT019893.2	3:154301535-154302253	719	19	8	14	9	4	6	1.09896	0.526864	0.918037	0.552521	0.252889	0.38416	0.847954	0.396523	1.09658	0.0399767	1	-
NONRATT013568.2	18:70260459-70263199	1412	11	30	43	65	37	108	0.323973	1.00613	1.43582	2.03195	1.19117	3.52117	0.921974	2.2481	-1.28591	0.040216	1	-
NONRATT023393.2	5:114224950-114227867	418	6	0	2	8	10	7	0.596978	0	0.225604	0.844742	1.08754	0.77098	0.274194	0.901087	-1.71647	0.0402164	1	-
NONRATT007713.2	12:6711738-6715484	1343	70	39	17	15	16	28	2.16762	1.37514	0.596832	0.492993	0.541554	0.959781	1.37987	0.664776	1.05359	0.0402862	1	-
MSTRG.9091.2	16:87144802-87150679	1860	17	8	92	70	83	200	0.380101	0.203664	2.33208	1.66117	2.0285	4.95012	0.971948	2.87993	-1.56708	0.0403152	1	-
NONRATT029290.2	9:37776621-37778934	613	11	18	14	35	17	49	0.746249	1.39051	1.07678	2.52021	1.26068	3.67985	1.07118	2.48692	-1.21516	0.040357	1	-
NONRATT007463.2	12:36837528-36837894	367	0	0	0	4	1	1	0	0	0	0.481066	0.123829	0.1255	0	0.243465	-1	0.0404615	1	-
NONRATT021452.2	4:88606838-88610720	1792	42	18	7	7	14	7	0.974708	0.475659	0.184171	0.172426	0.355144	0.179838	0.544846	0.235802	1.20827	0.0405229	1	-
NONRATT025428.2	6:145785082-145785609	528	4	2	5	9	8	11	0.315021	0.179363	0.446462	0.752391	0.688738	0.959111	0.313615	0.80008	-1.35115	0.040712	1	-
NONRATT010570.2	15:51804870-51809729	345	5	5	2	10	7	17	0.602765	0.686259	0.27334	1.27936	0.922344	2.26847	0.520788	1.49006	-1.5166	0.0407182	1	-
NONRATT020090.2	4:594879-626742	645	0	1	12	0	1	0	0	0.0734138	0.877157	0	0.0704577	0	0.316857	0.0234859	3.75396	0.0407844	1	-
NONRATT017751.2	20:32223482-32223841	360	14	12	16	9	7	5	1.61733	1.57853	2.09547	1.10351	0.883913	0.639443	1.76378	0.875621	1.01029	0.0408756	1	-
NONRATT014712.2	19:43194139-43196408	598	25	8	34	5	17	6	1.73861	0.63347	2.68067	0.369082	1.29231	0.461892	1.68425	0.70776	1.25078	0.0411989	1	-
NONRATT029679.2	9:100436154-100438250	2097	9	9	12	25	12	33	0.178486	0.203249	0.269798	0.526234	0.260124	0.724456	0.217178	0.503605	-1.21342	0.0414718	1	-
NONRATT020099.2	4:2053762-2063860	771	7	21	21	13	3	5	0.377587	1.2898	1.28418	0.744246	0.176889	0.298572	0.983856	0.406569	1.27495	0.041478	1	-
NONRATT022839.2	5:164857315-164858783	384	2	2	2	11	5	4	0.216577	0.246624	0.245579	1.26442	0.591854	0.479533	0.23626	0.778603	-1.72051	0.0415363	1	-
NONRATT017510.2	20:3242492-3246976	4485	45	16	18	13	17	8	0.417263	0.168936	0.189225	0.127941	0.172307	0.0821141	0.258475	0.127454	1.02004	0.041573	1	-
NONRATT013011.2	17:57316815-57318193	390	6	9	10	53	4	21	0.639838	1.09286	1.20888	5.9985	0.466223	2.47888	0.980525	2.9812	-1.60427	0.0416469	1	-
NONRATT026982.2	7:107264235-107367929	406	0	1	0	3	3	2	0	0.11663	0	0.326196	0.335916	0.226774	0.0388767	0.296295	-2.93006	0.0417025	1	-
NONRATT008807.2	13:69355919-69474965	561	8	12	11	21	19	28	0.593052	1.01296	0.92449	1.65226	1.53955	2.29766	0.8435	1.82982	-1.11724	0.0417084	1	-
NONRATT007788.2	12:15968177-15969451	782	0	0	1	2	3	3	0	0	0.0602651	0.112884	0.174401	0.176635	0.0200884	0.15464	-2.94448	0.0417346	1	-
NONRATT012492.2	17:49610566-49614330	721	118	54	30	39	22	36	6.80623	3.54666	1.96177	2.38757	1.38706	2.29863	4.10489	2.02442	1.01983	0.0417394	1	-
NONRATT002400.2	1:82112449-82113222	774	5	1	1	1	10	18	0.268674	0.0611781	0.060888	0.0570544	0.587326	1.07059	0.130247	0.571656	-2.1339	0.0417683	1	-
NONRATT009666.2	14:115352796-115429670	754	10	2	2	17	9	15	0.551549	0.125602	0.125069	0.995179	0.542633	0.915851	0.267407	0.817887	-1.61287	0.0418326	1	-
NONRATT030144.2	9:79937558-79939422	759	1	0	0	2	3	3	0.0547862	0	0	0.116305	0.179686	0.181988	0.0182621	0.159326	-3.12506	0.0418701	1	-
NONRATT013022.2	17:46020443-46022396	449	4	1	1	0	0	0	0.370448	0.105461	0.104961	0	0	0	0.193623	0	1	0.0419907	1	-
NONRATT002900.2	X:157319040-157323878	763	0	0	10	0	0	0	0	0	0.617908	0	0	0	0.205969	0	1	0.0420181	1	-
NONRATT006412.2	11:23772624-23773430	807	41	15	3	4	11	6	2.11288	0.880204	0.175254	0.218775	0.619623	0.342269	1.05611	0.393556	1.42412	0.0420733	1	-
NONRATT029088.2	8:129239665-129240425	761	16	11	14	4	12	2	0.874382	0.684517	0.86737	0.231999	0.716795	0.120986	0.808756	0.356593	1.18143	0.0422593	1	-
NONRATT027360.2	7:143939459-143950314	671	5	6	4	2	1	2	0.309917	0.423415	0.28108	0.131558	0.0677276	0.137214	0.338137	0.112167	1.59197	0.0423707	1	-
NONRATT011845.2	16:19917549-19918487	939	7	4	6	14	14	12	0.310031	0.201712	0.301285	0.658119	0.677761	0.588309	0.27101	0.641396	-1.24287	0.0423779	1	-
NONRATT009663.2	14:115262157-115267722	794	17	29	48	56	61	94	0.890412	1.72959	2.85027	3.11316	3.49237	5.45013	1.82342	4.01855	-1.14003	0.0424173	1	-
NONRATT002501.2	1:88132049-88134478	731	5	17	13	26	24	31	0.284479	1.10127	0.838497	1.56994	1.49249	1.95228	0.741415	1.67157	-1.17285	0.0424453	1	-
NONRATT001297.2	1:205138756-205139505	750	10	0	0	0	0	0	0.55449	0	0	0	0	0	0.18483	0	1	0.0427547	1	-
NONRATT001757.2	1:263520569-263526296	947	58	21	32	0	23	17	2.54703	1.05009	1.59318	0	1.10403	0.826422	1.7301	0.643484	1.42688	0.0427881	1	-
NONRATT028503.2	8:50164116-50166207	2092	345	154	191	577	470	474	6.85831	3.48595	4.30465	12.1743	10.2129	10.4307	4.88297	10.9393	-1.16369	0.0427902	1	-
NONRATT000778.2	1:126885982-126886826	845	7	3	9	14	21	12	0.34452	0.168113	0.502173	0.73133	1.12973	0.653754	0.338269	0.838273	-1.30925	0.0428115	1	-
NONRATT029357.2	9:51400306-51538063	2757	30	5	6	122	23	10	0.452522	0.0858757	0.102614	1.95324	0.379222	0.166976	0.213671	0.833146	-1.96318	0.0428251	1	-
NONRATT020912.2	4:157662540-157666340	1091	8	26	19	8	12	0	0.304952	1.1285	0.821082	0.32365	0.499982	0	0.751512	0.274544	1.45276	0.0428455	1	-
NONRATT025168.2	6:105265786-105266107	322	22	1	7	0	6	0	2.84131	0.147056	1.02495	0	0.847091	0	1.33777	0.282364	2.2442	0.0428827	1	-
NONRATT017207.2	20:7630716-7631070	355	11	9	9	19	17	27	1.28859	1.2006	1.19531	2.36237	2.1769	3.50134	1.22817	2.6802	-1.12583	0.0431	1	-
NONRATT015052.2	2:54365492-54366579	1088	0	0	0	0	3	3	0	0	0	0	0.125351	0.126957	0	0.0841025	-1	0.0432164	1	-
ENSRNOT00000077316	12:16240203-16247647	790	2	1	5	4	8	13	0.105273	0.0599391	0.298395	0.223483	0.460321	0.757571	0.154536	0.480458	-1.63647	0.0432813	1	-
NONRATT027381.2	7:145147282-145149879	474	42	23	41	86	53	92	3.68497	2.29776	4.07822	8.0085	5.08288	8.9353	3.35365	7.34223	-1.13048	0.0435623	1	-
NONRATT023388.2	5:113871315-113872682	343	6	16	4	0	2	6	0.727512	2.20897	0.549868	0	0.265121	0.805281	1.16212	0.356801	1.70357	0.0436243	1	-
NONRATT016832.2	2:226652021-226660156	510	29	30	37	68	56	75	2.36475	2.78559	3.42054	5.8853	4.99151	6.77002	2.85696	5.88228	-1.0419	0.0438825	1	-
NONRATT008285.2	13:60529820-60536590	331	0	9	0	0	0	0	0	1.28765	0	0	0	0	0.429218	0	1	0.0439998	1	-
NONRATT028259.2	8:12338381-12347385	706	0	9	0	0	0	0	0	0.603702	0	0	0	0	0.201234	0	1	0.044011	1	-
NONRATT010578.2	15:52454335-52456411	2077	12	11	7	6	5	3	0.240266	0.250803	0.158899	0.127504	0.109423	0.0665041	0.216656	0.101144	1.099	0.044109	1	-
NONRATT003528.2	1:222480245-222495192	430	3	0	3	0	0	0	0.290112	0	0.328906	0	0	0	0.206339	0	1	0.0442429	1	-
NONRATT021106.2	4:7261368-7262113	746	1	0	1	1	4	6	0.055741	0	0.0631733	0.0591958	0.243736	0.370256	0.0396381	0.224396	-2.50109	0.044368	1	-
NONRATT023928.2	5:172039877-172040854	978	373	86	366	734	581	637	15.861	4.1641	17.6445	33.1275	27.0052	29.9846	12.5565	30.0391	-1.25841	0.044645	1	-
NONRATT027495.2	8:22453401-22454201	360	6	7	4	3	1	2	0.693158	0.920731	0.523902	0.367877	0.126237	0.255751	0.712597	0.249955	1.51142	0.0447136	1	-
NONRATT020601.2	4:113887103-113888359	840	4	8	10	25	35	4	0.198013	0.45097	0.561266	1.3137	1.8941	0.219215	0.403417	1.14234	-1.50165	0.0448308	1	-
NONRATT001118.2	1:177765721-177766465	745	17	11	24	43	32	34	0.948976	0.699218	1.5189	2.5477	1.95257	2.101	1.0557	2.20042	-1.05958	0.0449296	1	-
NONRATT003381.2	1:216810185-216828574	738	0	0	0	11	0	0	0	0	0	0.657911	0	0	0	0.219304	-1	0.0449739	1	-
NONRATT003165.2	1:197962454-197963355	902	14	10	25	10	7	7	0.645498	0.525017	1.30677	0.489333	0.352781	0.357284	0.825762	0.399799	1.04645	0.0450317	1	-
NONRATT020358.2	4:62375015-62375321	307	1	2	3	7	4	8	0.135449	0.308481	0.460683	1.00647	0.59227	1.19961	0.301538	0.932785	-1.62921	0.0451192	1	-
NONRATT017476.2	20:50902239-50902919	681	14	14	4	21	23	33	0.854977	0.973529	0.276952	1.36111	1.53527	2.23082	0.701819	1.70906	-1.28404	0.0452447	1	-
NONRATT004193.2	10:31845646-31846602	957	8	22	13	9	122	17	0.347651	1.0886	0.640482	0.415112	5.79507	0.817787	0.692244	2.34266	-1.75879	0.0452793	1	-
NONRATT018768.2	3:148709556-148712496	2941	16	20	21	42	47	30	0.226251	0.322028	0.336655	0.630356	0.726462	0.469603	0.294978	0.608807	-1.04538	0.0453327	1	-
NONRATT013477.2	18:55838276-55839403	1128	148	138	165	134	60	31	5.45646	5.79338	6.89671	5.24356	2.41799	1.26517	6.04885	2.97557	1.02349	0.0453572	1	-
NONRATT029185.2	9:16543720-16557359	587	19	0	9	0	5	0	1.34609	0	0.72289	0	0.387176	0	0.689659	0.129059	2.41786	0.045362	1	-
NONRATT030946.2	X:29613536-29613928	393	6	3	5	1	1	2	0.634954	0.361465	0.599827	0.112367	0.115637	0.234276	0.532082	0.154093	1.78785	0.0454527	1	-
NONRATT023491.2	5:135393995-135399670	2168	1	104	1	2	550	469	0.0191802	2.27162	0.0217377	0.0407175	11.5322	9.95891	0.770846	7.17729	-3.21892	0.0455601	1	-
ENSRNOT00000087172	13:110554021-110554875	429	11	10	13	5	5	7	1.06632	1.10388	1.42877	0.514478	0.529772	0.751212	1.19966	0.598487	1.00323	0.0456943	1	-
NONRATT001639.2	1:244742292-244743000	709	14	16	30	47	46	34	0.821212	1.06866	1.99498	2.92608	2.94934	2.20768	1.29495	2.69436	-1.05705	0.0457274	1	-
NONRATT027555.2	8:35719273-35719794	522	0	0	1	2	4	2	0	0	0.0902822	0.16911	0.348327	0.17638	0.0300941	0.231273	-2.94204	0.0457458	1	-
NONRATT028020.2	8:116285040-116285643	604	1	0	0	2	4	2	0.0688456	0	0	0.146152	0.301038	0.152434	0.0229485	0.199875	-3.12262	0.0459019	1	-
NONRATT001931.2	1:2339119-2339841	723	2	0	1	5	3	4	0.115028	0	0.065183	0.305271	0.188633	0.25469	0.0600705	0.249531	-2.05449	0.0460371	1	-
ENSRNOT00000077676	2:254279745-254285885	717	3	3	0	0	0	0	0.173986	0.198125	0	0	0	0	0.124037	0	1	0.0460492	1	-
NONRATT023685.2	5:151828144-151832821	895	73	83	24	22	41	26	3.39203	4.39155	1.26434	1.085	2.08241	1.33734	3.01597	1.50158	1.00614	0.0462585	1	-
NONRATT029197.2	9:16771851-16835289	1122	6	4	10	15	13	19	0.222404	0.168812	0.420199	0.590097	0.526713	0.779583	0.270472	0.632131	-1.22475	0.0464612	1	-
NONRATT026181.2	7:125609986-125612291	2306	10	13	9	4	8	3	0.180342	0.266965	0.184014	0.0765617	0.157699	0.0598998	0.21044	0.0980535	1.10177	0.046504	1	-
NONRATT026679.2	7:33101304-33133635	294	4	2	3	9	9	6	0.565752	0.322122	0.481053	1.35123	1.39165	0.939494	0.456309	1.22746	-1.42759	0.0465166	1	-
NONRATT024472.2	6:106578624-106579002	379	1	1	0	2	4	4	0.109717	0.124939	0	0.232917	0.479754	0.48586	0.0782187	0.39951	-2.35265	0.0466323	1	-
NONRATT007471.2	12:37451660-37453370	1711	3	2	5	2	7	26	0.0729096	0.0553499	0.137774	0.051593	0.185978	0.699541	0.0886779	0.312371	-1.81661	0.0468236	1	-
NONRATT029667.2	9:98484401-98484933	533	24	32	7	8	13	8	1.87262	2.84306	0.619201	0.662481	1.10877	0.69096	1.7783	0.820736	1.11551	0.0469237	1	-
NONRATT023654.2	5:148490374-148491058	685	1	1	4	6	8	5	0.0607048	0.0691268	0.275335	0.386608	0.530882	0.336057	0.135056	0.417849	-1.62943	0.047428	1	-
NONRATT004023.2	10:11281800-11284325	2526	8	13	3	1	2	5	0.131711	0.243714	0.0559895	0.0174822	0.0360002	0.091132	0.143805	0.0482048	1.57686	0.047508	1	-
NONRATT029691.2	9:100743293-100744051	759	18	11	10	29	26	28	0.986258	0.686321	0.621164	1.68651	1.55718	1.69827	0.764581	1.64732	-1.10738	0.0476209	1	-
NONRATT001095.2	1:175559242-175559748	507	2	4	2	1	0	0	0.164035	0.373585	0.186001	0.0871007	0	0	0.241207	0.0290336	3.05448	0.0478365	1	-
NONRATT018629.2	3:124068775-124088668	377	1	1	1	3	3	6	0.110299	0.125602	0.125006	0.351288	0.361755	0.732656	0.120302	0.4819	-2.00207	0.0480253	1	-
NONRATT030554.2	X:22399166-22399885	720	1	1	1	3	3	6	0.0577538	0.0657665	0.0654546	0.183938	0.189419	0.383627	0.0629916	0.252328	-2.00207	0.0480278	1	-
NONRATT020863.2	4:153081568-153082012	445	0	0	0	0	1	6	0	0	0	0	0.102124	0.620699	0	0.240941	-1	0.0480913	1	-
NONRATT009875.2	14:42476230-42491422	462	0	0	0	4	0	2	0	0	0	0.382145	0	0.199287	0	0.193811	-1	0.0482916	1	-
NONRATT013811.2	18:41355009-41355543	535	4	7	22	32	26	21	0.310899	0.619557	1.93884	2.6401	2.20916	1.80703	0.956431	2.21876	-1.21402	0.0483547	1	-
NONRATT024020.2	6:10594145-10597064	413	13	12	6	5	6	4	1.309	1.37595	0.685005	0.53441	0.660444	0.445862	1.12332	0.546905	1.0384	0.0485464	1	-
NONRATT018751.2	3:148234852-148237613	357	0	0	0	0	6	1	0	0	0	0	0.764043	0.129015	0	0.297686	-1	0.0485715	1	-
NONRATT028820.2	8:90630870-90631613	744	6	14	17	26	25	28	0.335399	0.891093	1.07735	1.54251	1.52749	1.73251	0.767946	1.60084	-1.05975	0.0487128	1	-
NONRATT002015.2	1:24189815-24193567	399	0	0	0	0	2	4	0	0	0	0	0.227911	0.461506	0	0.229806	-1	0.0488239	1	-
NONRATT004228.2	10:36715549-36727196	562	0	3	0	3	3	9	0	0.252768	0	0.235651	0.242672	0.73726	0.084256	0.405194	-2.26576	0.0490016	1	-
NONRATT008688.2	13:49159788-49160586	799	2	3	3	6	3	17	0.104087	0.177792	0.177008	0.331448	0.170691	0.979502	0.152962	0.49388	-1.69098	0.0490415	1	-
NONRATT028531.2	8:53837606-53839182	1577	4	4	2	11	18	3	0.105473	0.120106	0.0597985	0.307887	0.518861	0.0875897	0.0951259	0.304779	-1.67985	0.0492799	1	-
NONRATT004308.2	10:43485402-43487746	486	2	1	1	3	9	3	0.171122	0.0974318	0.0969697	0.272501	0.841862	0.284216	0.121841	0.466193	-1.93592	0.0494545	1	-
NONRATT029937.2	9:44085448-44126796	668	10	1	0	0	1	0	0.622557	0.070886	0	0	0.0680317	0	0.231148	0.0226772	3.3495	0.0494604	1	-
NONRATT000681.2	1:100950451-100953942	801	0	0	2	6	1	4	0	0	0.117731	0.33062	0.0567356	0.229889	0.0392436	0.205748	-2.39035	0.0496129	1	-
NONRATT007600.2	12:46594337-46595443	1107	302	363	91	73	11	194	11.3454	15.5282	3.87578	2.91076	0.451703	8.06772	10.2498	3.81006	1.42771	0.0496486	1	-
NONRATT014183.2	19:34055543-34056525	537	4	4	5	11	9	12	0.309741	0.352714	0.438979	0.904168	0.761909	1.02872	0.367145	0.898265	-1.29079	0.0498008	1	-
NONRATT004929.2	10:90134103-90137553	721	0	3	0	15	0	5	0	0.197026	0	0.918293	0	0.319278	0.0656753	0.412524	-2.65105	0.0498131	1	-
NONRATT003735.2	1:255664714-255665682	969	15	87	28	102	161	86	0.643779	4.25165	1.36237	4.64631	7.55289	4.08578	2.08593	5.42833	-1.37982	0.0498224	1	-
ENSRNOT00000077787	1:94836296-94840706	3481	15	23	17	9	15	3	0.179208	0.312881	0.230263	0.114123	0.195881	0.0396808	0.240784	0.116562	1.04665	0.0498488	1	-
LncRNA, long non-coding RNA; CI-AKI, contrast-induced acute kidney injury; FPKM, fragments per kilobase of transcript per million mapped reads; FC, fold change.
